# Supplementary material for: Transnitrosylation products of the dipeptide cysteinyl–cysteine: an examination by tandem mass spectrometry and density functional theory
Source: Royal Society of Chemistry journal article supplement (doi:10.1039/c5cp08014b), 2016-01-01

**Transnitrosylation Products of the Dipeptide Cysteinyl-Cysteine: An Examination  
by Tandem Mass Spectrometry and Density Functional Theory  
Electronic Supplementary Information (ESI)**

Matias Butler<sup>1,2</sup>, K.W. Michael Siu<sup>1,3</sup> and Alan C. Hopkinson<sup>1</sup>

<sup>1</sup> Department of Chemistry and Centre for Research in Mass Spectrometry, York University, 4700 Keele Street, Toronto, Ontario, Canada M3J 1P3.

<sup>2</sup> Current address: Departamento de Química Orgánica, UMyMFOR-CONICET, Facultad de Ciencias Exactas y Naturales, Universidad de Buenos Aires, Ciudad Universitaria, Pabellón II, 3º piso, C1428EHA, Buenos Aires, Argentina

<sup>3</sup> Department of Chemistry and Biochemistry, University of Windsor, 401 Sunset Avenue, Windsor, Ontario, Canada N9B 3P4

Contents

|                                                   |     |
|---------------------------------------------------|-----|
| 1. Mass spectra (Figures S1-S7)                   | S2  |
| 2. Optimized structures (Figure S8)               | S9  |
| 3. Energy profiles (Figures S9-S10)               | S10 |
| 4. Total energies of calculated structures        | S12 |
| 5. Cartesian coordinates of calculated structures | S14 |

a)

T: FTMS + p ESI Full ms3 283.00@cid40.00 223.02@cid20.00 [60.00-300.00]

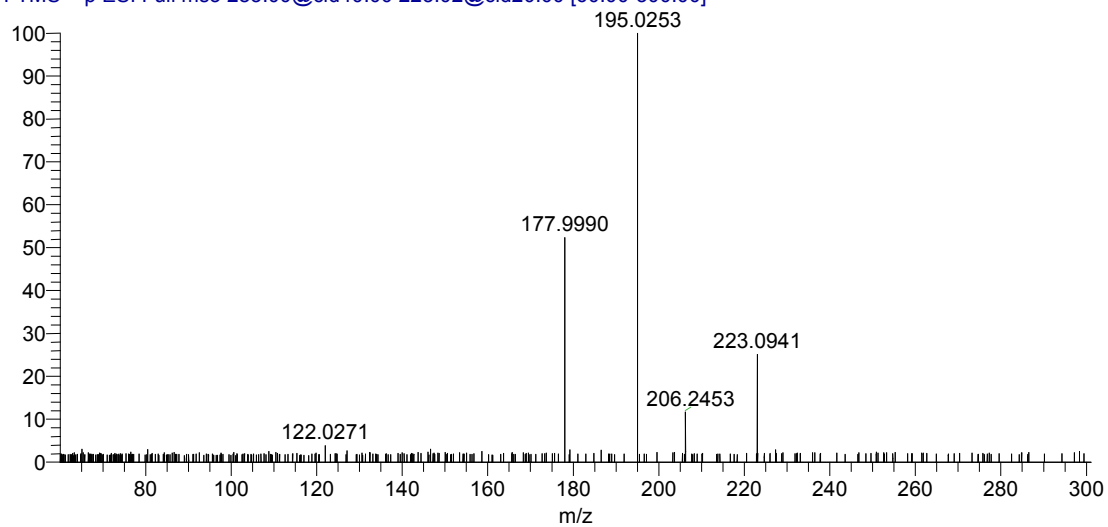

b)

T: FTMS + p ESI Full ms2 223.00@cid20.00 [60.00-300.00]

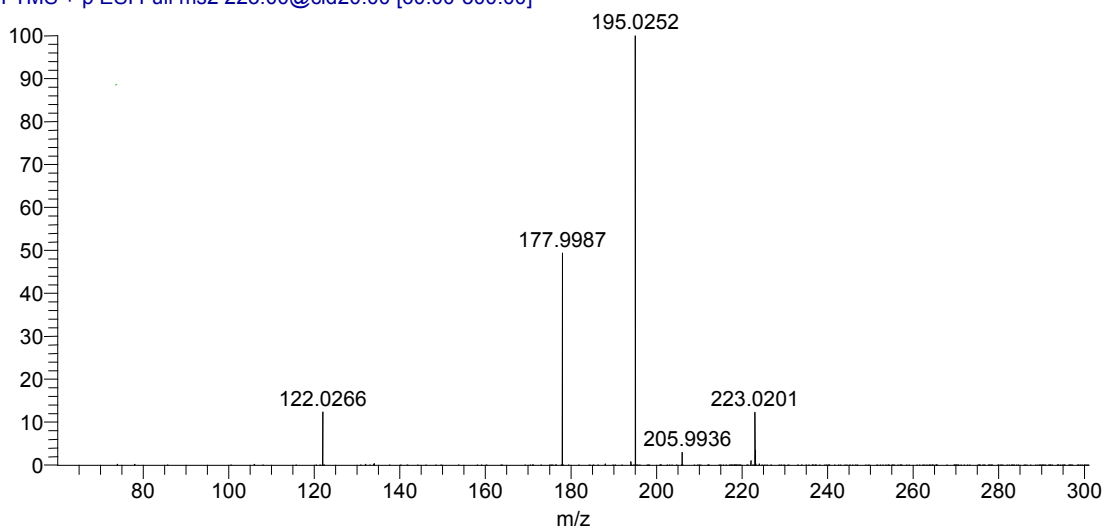

**Figure S1.** a) HR-(+)ESI MS<sup>3</sup> mass spectrum (CE 20 eV) obtained in the Orbitrap selecting the precursor ion of [CysNO-CysNO+H]<sup>+</sup> (*m/z* 283). b) HR-ESI(+) CID mass spectrum (CE 20 eV) obtained in the Orbitrap selecting the precursor ion of [ox-(Cys-Cys)+H]<sup>+</sup> (*m/z* 223).

a)

T: + p Full ms3 241.00@cid22.00 195.00@cid15.00 [50.00-250.00]

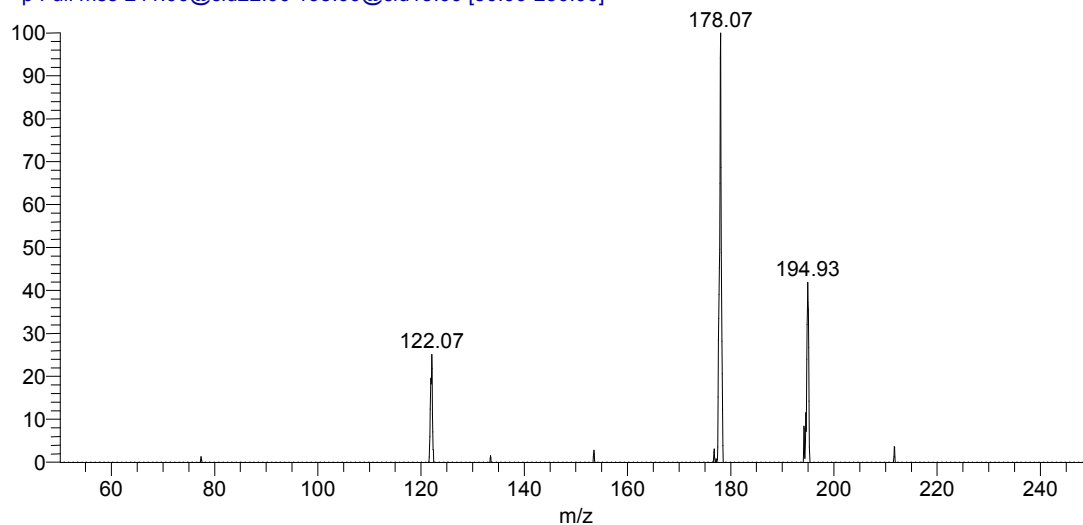

b)

T: + p Full ms3 223.00@cid17.00 195.00@cid15.00 [50.00-250.00]

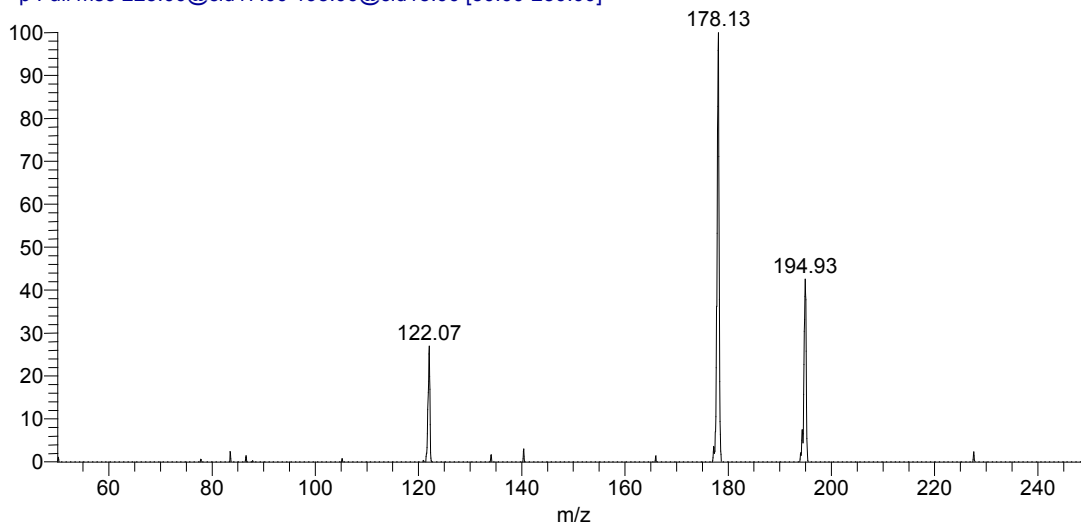

**Figure S2.** ESI(+)- CID MS<sup>3</sup> mass spectra (CE 15 eV) obtained in the LCQ selecting the precursor ion of  $m/z$  195.00 a) after dissociation of  $[(\text{Cys})_2+\text{H}]^+$  ( $m/z$  241) and b) after dissociation of  $[\text{ox}-(\text{Cys}-\text{Cys})+\text{H}]^+$  ( $m/z$  223).

a)

T: ITMS + p ESI Full ms2 122.00@cid20.00 [50.00-150.00]

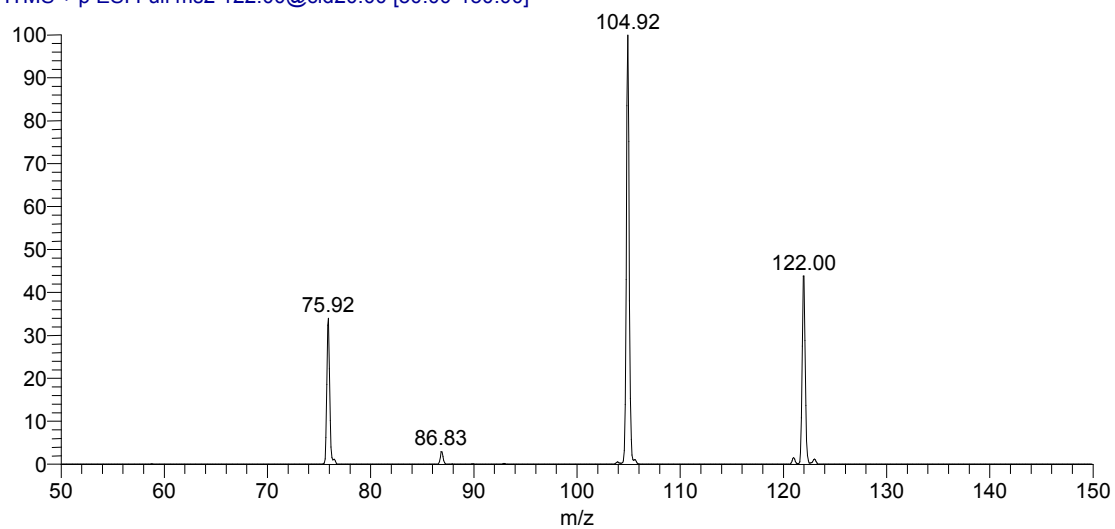

b)

T: FTMS + p ESI Full ms2 122.00@cid20.00 [50.00-150.00]

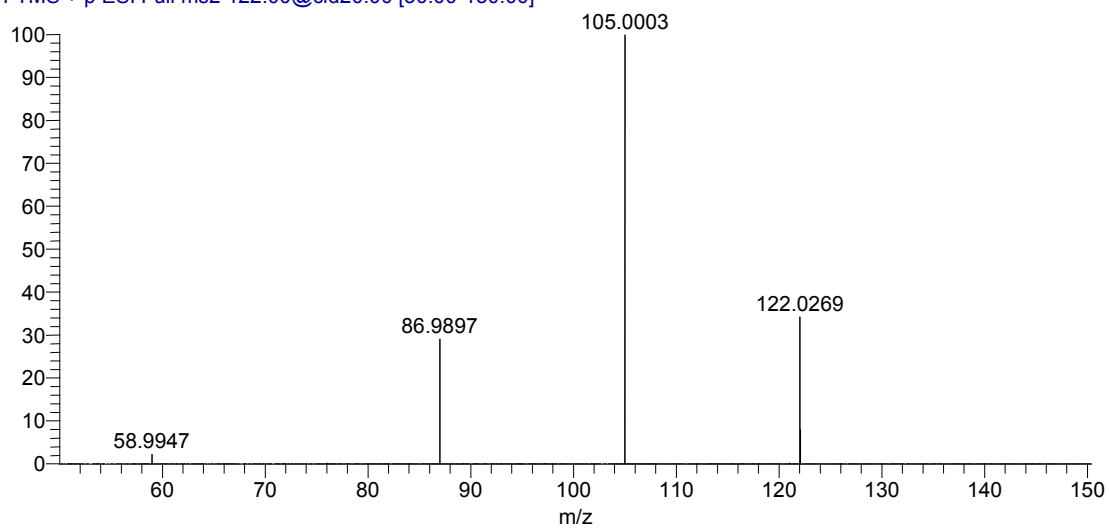

**Figure S3.** ESI(+)-CID mass spectra (CE 20 eV) obtained in the Orbitrap selecting the precursor ion of [Cys+H]<sup>+</sup> (*m/z* 122) with both low a) and high b) resolution and accuracy.

a)

T: ITMS + p ESI Full ms3 223.08@cid20.00 122.00@cid20.00 [50.00-200.00]

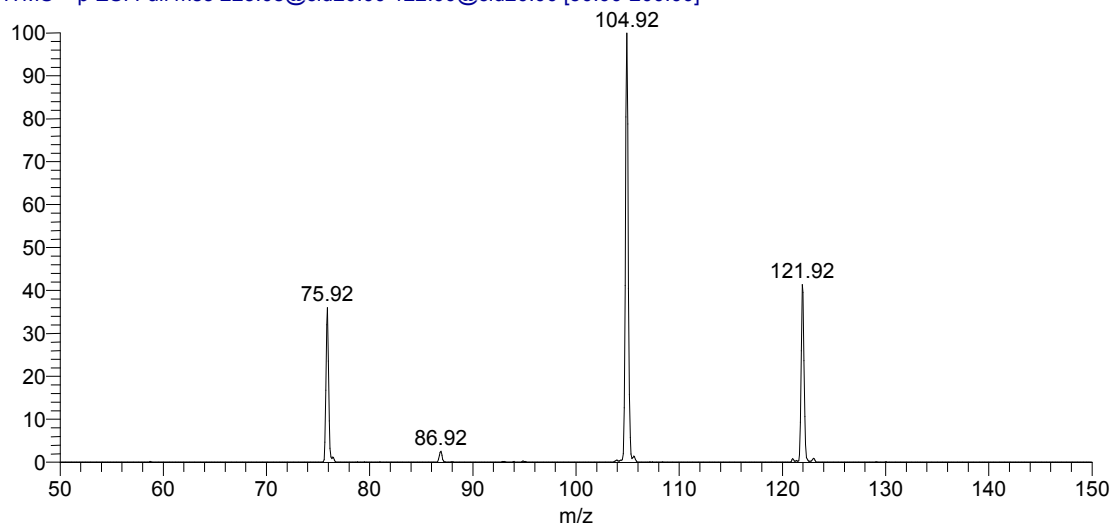

b)

T: FTMS + p ESI Full ms3 223.08@cid20.00 122.00@cid20.00 [50.00-200.00]

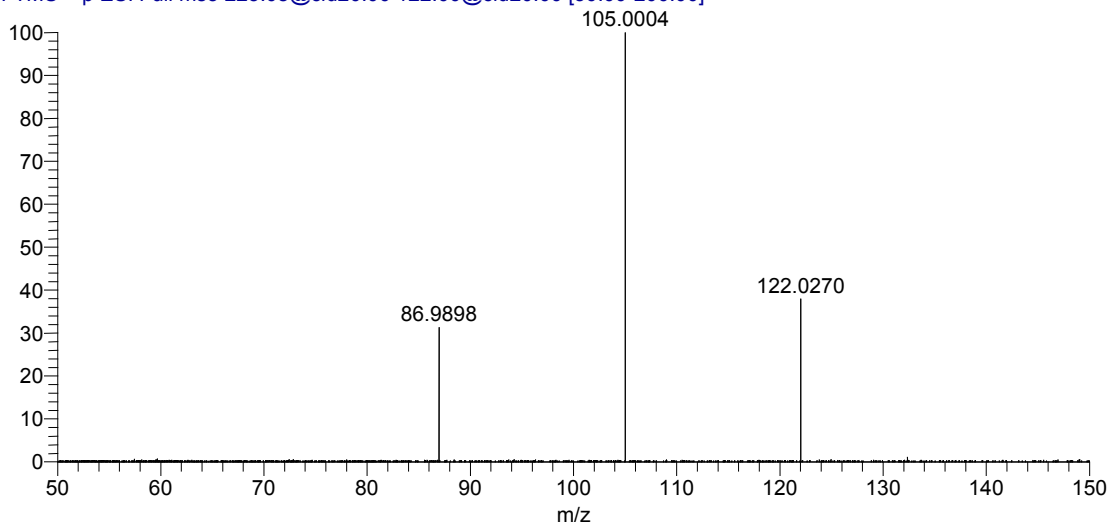

**Figure S4.** ESI(+)-CID MS<sup>3</sup> (CE 20 eV) mass spectrum obtained in the Orbitrap selecting the precursor ion of  $m/z$  122.00 after dissociation of  $[\text{ox}-(\text{Cys-Cys})+\text{H}]^+$  ( $m/z$  223) with both low a) and high b) resolution and accuracy.

There is a difference between the conditions in the collision cell when using the ion trap (low resolution) (Figures S3a and S4a) and the Orbitrap (high resolution) (Figures S3b and S4b), namely the pressure. Therefore, the activation conditions of the ions are not the same. Taking that into account, it is not surprising to obtain differences in the product ion abundances. The ion of  $m/z$  75.92 may be a product ion obtained from some of the other ions seen in the spectrum and the ion activation conditions may not be enough to produce it at high resolution.

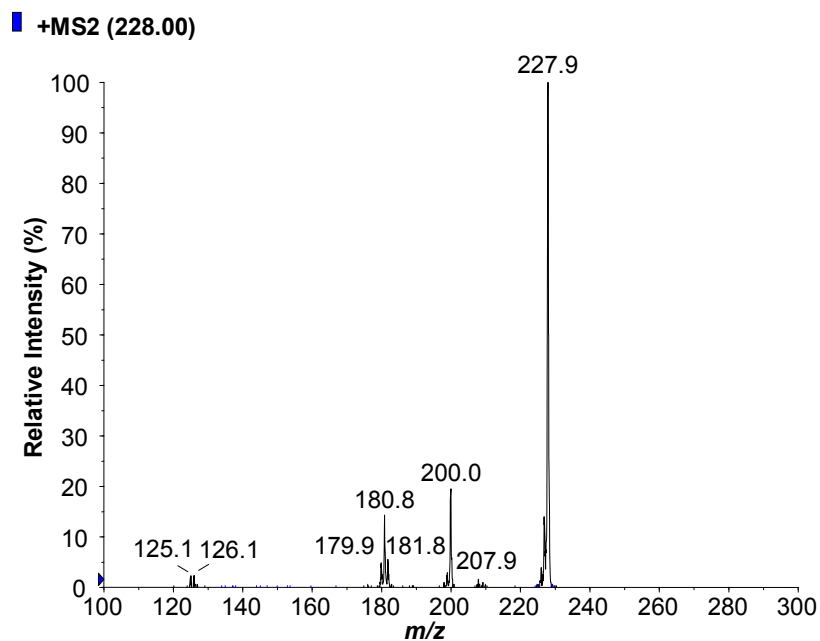

**Figure S5.** ESI(+)-CID mass spectrum obtained in the 2000-Qtrap selecting the precursor ion of [ox-(Cys-Cys)- $d_4$ +D]<sup>+</sup> ( $m/z$  228).

a)

T: + p Full ms2 245.00@cid22.00 [65.00-250.00]

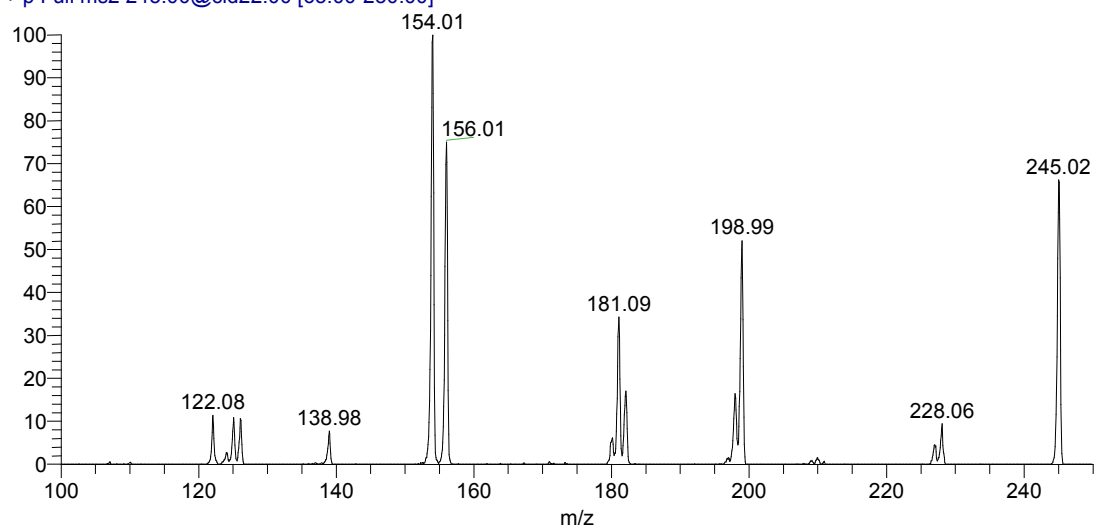

b)

T: + p Full ms3 245.00@cid22.00 199.00@cid15.00 [50.00-250.00]

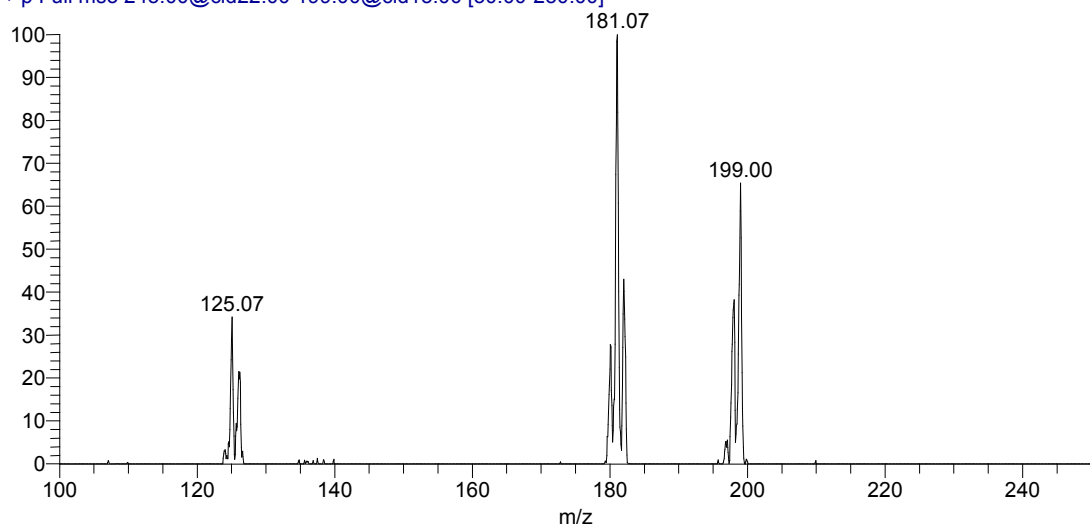

**Figure S6.** a) ESI(+)-CID mass spectrum (CE 22 eV) obtained in the LCQ selecting the precursor ion of protonated cystine- $d_4$  ( $m/z$  241). b) CID MS<sup>3</sup> (CE 15 eV) selecting the precursor ion of  $m/z$  199.00.

a)

T: + p Full ms2 247.00@cid22.00 [65.00-250.00]

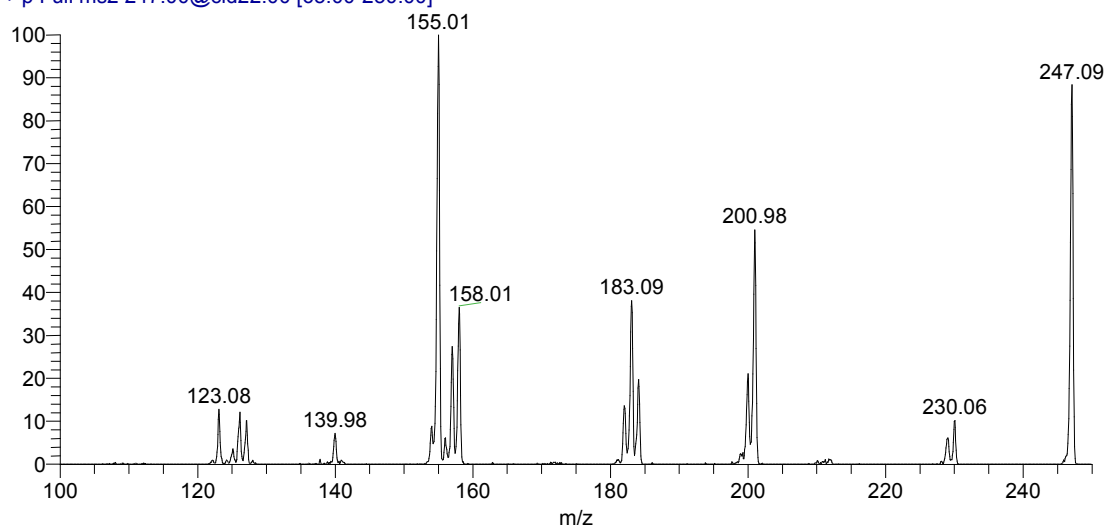

b)

T: + p Full ms3 247.00@cid22.00 201.00@cid15.00 [55.00-250.00]

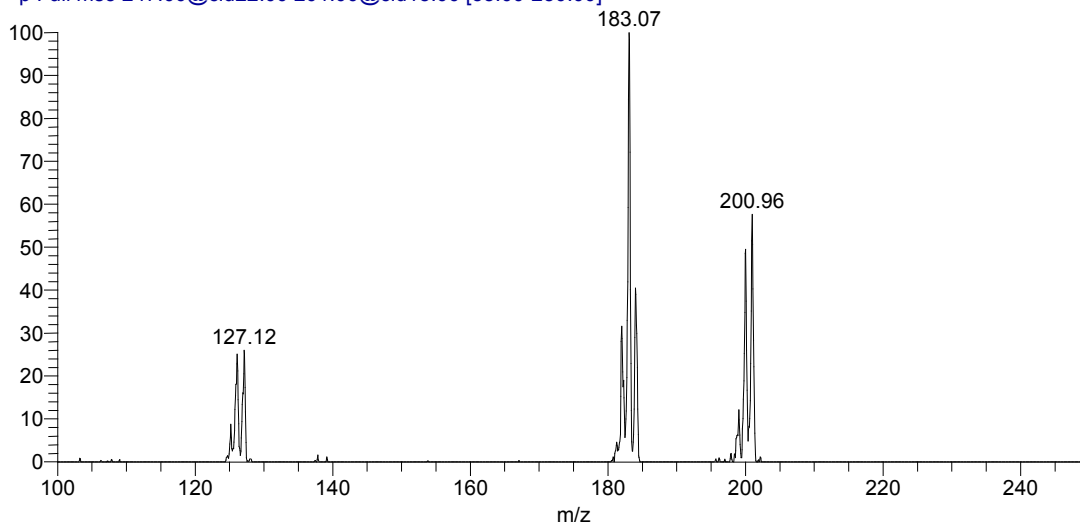

**Figure S7.** a) ESI (+)-CID mass spectrum (CE 22 eV) obtained in the LCQ selecting the precursor ion of protonated cystine- $d_6$  ( $m/z$  243). b) CID MS<sup>3</sup> (CE 15 eV) selecting the precursor ion of  $m/z$  201.00.



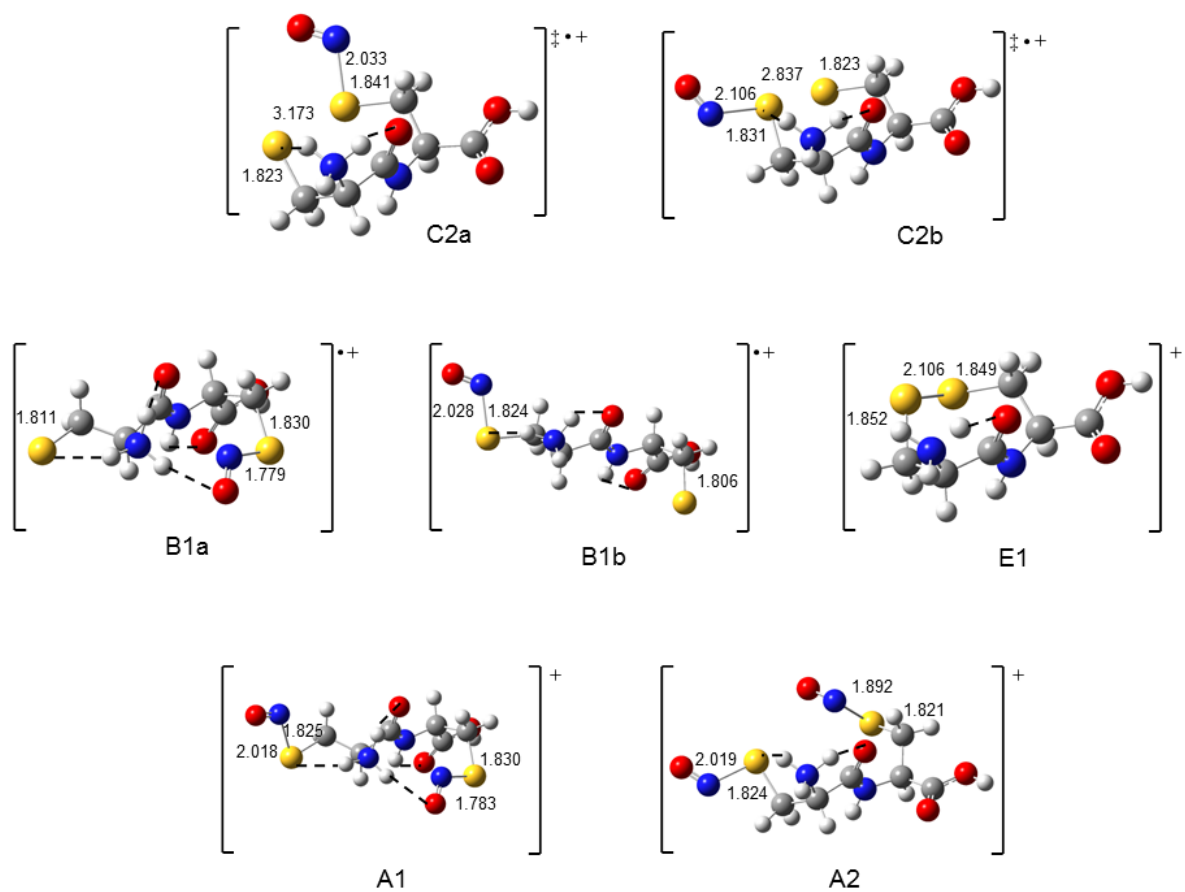

**Figure S8.** Optimized structures of  $[\text{CysNO-CysNO+H}]^+$  (A1-A2), the radical cations  $[\text{Cys}^\bullet\text{-CysNO+H}]^+$  (B1a) and  $[\text{CysNO-CysS}^\bullet\text{+H}]^+$  (B1b) and the transition state structures (C2a and C2b) leading to formation of  $[\text{ox-(Cys-Cys)+H}]^+$  (E1). Relevant distances for bonds involving the sulfur atoms are given in Å.

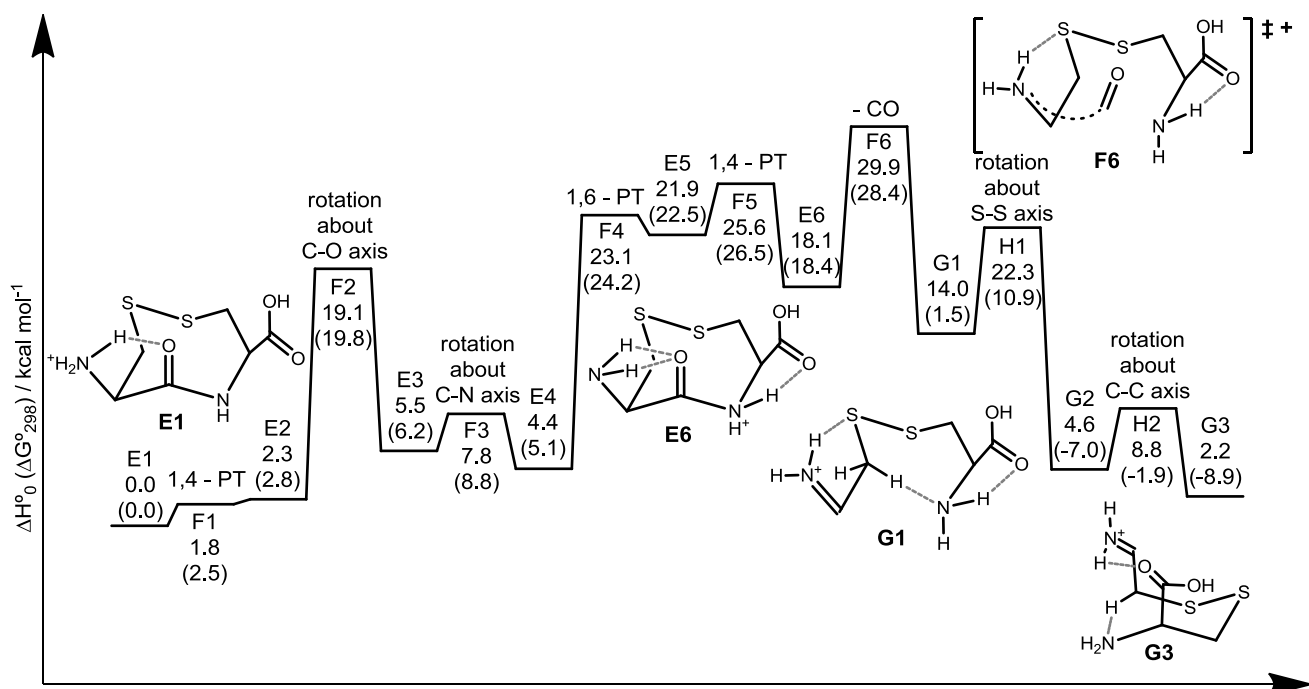

**Figure S9.** Fragmentation pathway for the loss of CO starting from structure **E1**. The energetic contribution of the CO molecule lost from structure **G1** onwards is considered although not shown for simplicity in the diagram. The enthalpies at 0K ( $\Delta H^\circ_0$ ) and free energies at 298K ( $\Delta G^\circ_{298}$ , in parentheses) are given in kcal mol<sup>-1</sup> relative to structure **E1**. Transition state structures **F<sub>n</sub>** are associated with rearrangements and dissociation of protonated ox-(Cys-Cys), *m/z* 223; structures **H<sub>n</sub>** are transition states associated with rearrangements and dissociation of the *m/z* 195 ion.

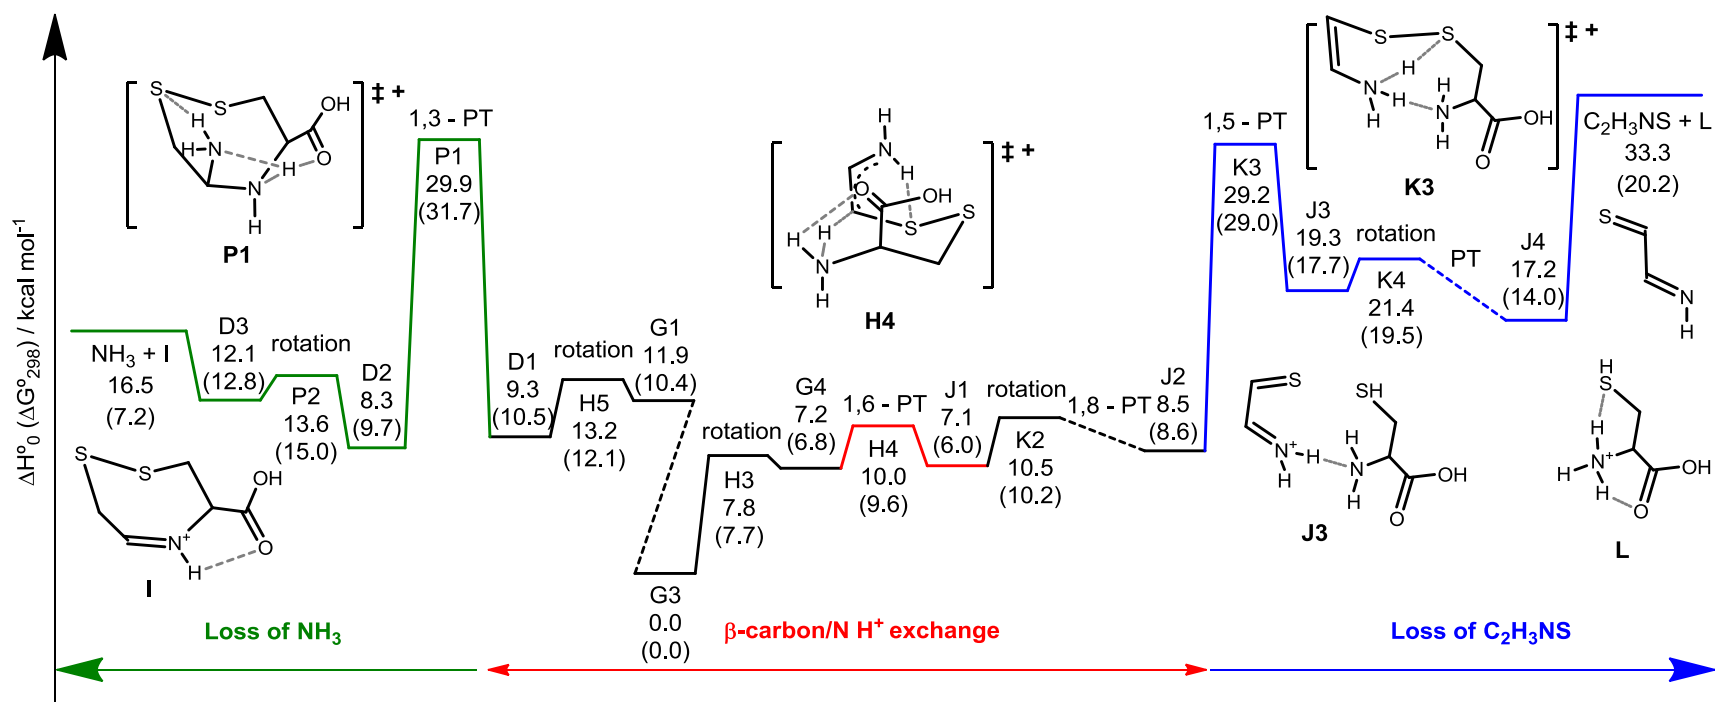

**Figure S10.** Energy barriers and pathways after the loss of CO starting from the structure **G3**: proton exchange between the  $\beta$ -carbon and the nitrogen (middle in red); loss of ammonia (left side in green) and loss of C<sub>2</sub>H<sub>3</sub>NS (right side in blue). The enthalpies at 0K ( $\Delta H^\circ_0$ ) and free energies at 298K ( $\Delta G^\circ_{298}$ , in parentheses) are given in kcal mol<sup>-1</sup> relative to structure **G3**. The interconversion steps between structures **G1** and **G3** are shown in Figure S9. Proton transfers (PT) that occur with trivial energy barriers are omitted. **P1** and **K3** are the critical transition states leading to product ions **I** and **L** respectively.

#### 4. Total energies of calculated structures

Table S1. Total electronic energies and unscaled zero-point vibrational energies (ZPVE) at the UB3LYP-6-311++G(d,p) level (all data in hartrees)

| Structure | Electronic energy | ZPVE      |
|-----------|-------------------|-----------|
| A1        | -1626.7155512     | 0.2022544 |
| A2        | -1626.7074182     | 0.2014062 |
| NO        | -129.9316566      | 0.00451   |
| B1a       | -1496.7409555     | 0.1945265 |
| B1b       | -1496.7381876     | 0.1934034 |
| B2a       | -1496.7334583     | 0.1939715 |
| B2b       | -1496.7322455     | 0.1933981 |
| C2a       | -1496.7323868     | 0.1936459 |
| C2b       | -1496.7262677     | 0.1933211 |
| E1        | -1366.8251065     | 0.1880665 |
| E2        | -1366.8207582     | 0.1873304 |
| E3        | -1366.8153852     | 0.1870877 |
| E4        | -1366.817142      | 0.1871719 |
| E5        | -1366.7889097     | 0.1867531 |
| E6        | -1366.7948972     | 0.1867039 |
| F1        | -1366.8184777     | 0.1843216 |
| F2        | -1366.7920325     | 0.1854346 |
| F3        | -1366.8111421     | 0.1864675 |
| F4        | -1366.7863407     | 0.1861738 |
| F5        | -1366.7791376     | 0.1829587 |
| F6        | -1366.771983      | 0.1825235 |
| CO        | -113.3490503      | 0.0050387 |
| G1        | -1253.444685      | 0.1740044 |
| G2        | -1253.4609771     | 0.1752697 |

|        |               |           |
|--------|---------------|-----------|
| G3     | -1253.465333  | 0.1757346 |
| G4     | -1253.4525797 | 0.1744234 |
| H1     | -1253.4308659 | 0.1734022 |
| H2     | -1253.4542308 | 0.1752241 |
| H3     | -1253.4511668 | 0.1739896 |
| H4     | -1253.4443912 | 0.1707908 |
| H5     | -1253.442274  | 0.1737388 |
| D1     | -1253.4534325 | 0.1786555 |
| D2     | -1253.455114  | 0.1787513 |
| D3     | -1253.4483819 | 0.1781089 |
| P1     | -1253.4188401 | 0.1768857 |
| P2     | -1253.4453187 | 0.1774722 |
| I      | -1196.8517304 | 0.1368107 |
| NH3    | -56.582722    | 0.0342648 |
| J1     | -1253.4535447 | 0.1752628 |
| J2     | -1253.45213   | 0.1760985 |
| J3     | -1253.4302477 | 0.1714224 |
| J4     | -1253.4331714 | 0.1709986 |
| K2     | -1253.4483327 | 0.1755392 |
| K3     | -1253.4134717 | 0.1704385 |
| K4     | -1253.4249367 | 0.1695195 |
| L      | -722.4259278  | 0.1219837 |
| C2H3NS | -530.9805622  | 0.0480119 |

## 10. Cartesian coordinates of calculated structures

B3LYP/6-311++G(d,p) fully optimized geometries, given in standard XYZ format: coordinates are Cartesian coordinates in the usual order, units are ångstroms, first line is molecule name, second line indicates total number of atoms.

```
A1
28
C          0.08449      -0.30541      0.56228
O          0.19314      -0.04056      1.75077
C          1.26744       0.05174     -0.36790
C          2.42710     -0.94692     -0.22095
N          1.70430       1.41731      0.10596
H          0.96968       0.15479     -1.41145
H          2.68222       1.57502     -0.18231
H          1.10236       2.16391     -0.26642
H          2.12343     -1.89698     -0.66147
H          2.65035     -1.11897      0.83880
S          3.96856     -0.37616     -1.01378
N          5.00062     -0.55138      0.71192
O          6.12551     -0.35385      0.65837
H          1.62060       1.41731      1.13541
N         -0.99578     -0.84122     -0.02535
C         -2.27653     -0.99868      0.65077
H         -1.01102     -1.05506     -1.01796
C         -3.19848     -1.71868     -0.33519
C         -2.86173      0.34830      1.14777
H         -2.16090     -1.63528      1.53415
O         -4.38703     -1.97688      0.21402
O         -2.87398     -2.00153     -1.45972
H         -2.22216      0.75561      1.92931
H         -3.85680      0.18570      1.56189
S         -3.04399      1.63247     -0.14381
H         -4.94655     -2.43481     -0.43469
N         -1.32432      2.10026     -0.10848
O         -0.94413      2.91421     -0.90253
```

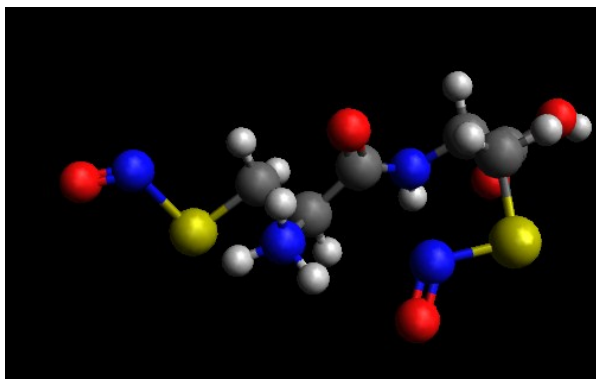

```
A2
28
C          0.29672     -1.09204      0.21408
O          0.66083     -1.11157      1.38468
C         -1.04991     -1.79411     -0.12994
C         -2.06429     -1.01081     -0.97996
N         -1.61203     -2.13405      1.22359
H         -0.80137     -2.73421     -0.62971
H         -1.96982     -3.08604      1.29991
H         -2.35160     -1.45313      1.46036
H         -2.87432     -1.67535     -1.30409
H         -1.57739     -0.64219     -1.88305
S         -2.84892      0.37907     -0.09762
N         -4.69130     -0.35576     -0.47469
O         -5.57707      0.29142     -0.15445
H         -0.79900     -1.97157      1.87309
N         0.98838     -0.55645     -0.79952
C         2.38298     -0.12974     -0.65818
H         0.63511     -0.66045     -1.73828
C         3.24317     -1.34855     -0.26111
C         2.56492      1.09648      0.25683
H         2.71840      0.14541     -1.66224
O         4.48593     -0.97116      0.06311
O         2.85663     -2.48583     -0.29553
```

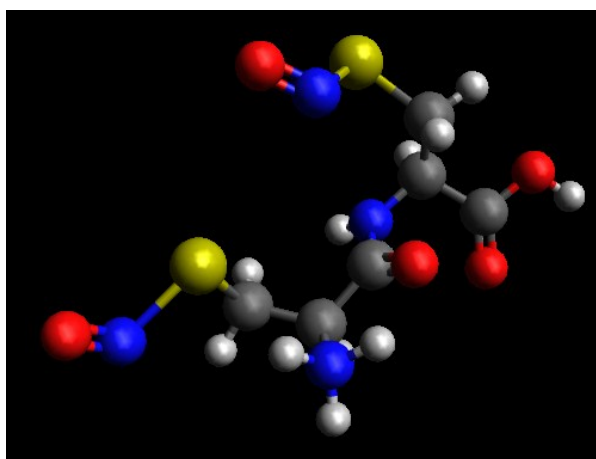

|   |          |          |          |
|---|----------|----------|----------|
| H | 3.62870  | 1.28989  | 0.38245  |
| H | 2.12782  | 0.91966  | 1.24119  |
| S | 1.80382  | 2.61015  | -0.41190 |
| H | 5.01392  | -1.76293 | 0.25592  |
| N | 0.31809  | 2.54087  | 0.75777  |
| O | -0.46287 | 3.40387  | 0.65923  |

B1a  
26

|   |          |          |          |
|---|----------|----------|----------|
| C | 0.64577  | -0.39712 | 0.67890  |
| O | 0.70261  | -0.11345 | 1.86624  |
| C | 1.90822  | -0.14910 | -0.17872 |
| C | 3.00267  | -1.19628 | 0.10793  |
| N | 2.39105  | 1.21424  | 0.24851  |
| H | 1.69725  | -0.09366 | -1.24694 |
| H | 3.39735  | 1.28801  | 0.01848  |
| H | 1.86466  | 1.97319  | -0.20633 |
| H | 2.71343  | -2.15583 | -0.32675 |
| H | 3.09373  | -1.35830 | 1.19053  |
| S | 4.65511  | -0.73281 | -0.46916 |
| H | 2.24516  | 1.28532  | 1.26761  |
| N | -0.43244 | -0.86745 | 0.03419  |
| C | -1.76262 | -0.91344 | 0.62745  |
| H | -0.40160 | -1.10321 | -0.95314 |
| C | -2.66763 | -1.59562 | -0.40073 |
| C | -2.28014 | 0.48624  | 1.04845  |
| H | -1.75080 | -1.52973 | 1.53243  |
| O | -3.90445 | -1.75460 | 0.07340  |
| O | -2.29102 | -1.93074 | -1.49430 |
| H | -1.66434 | 0.87316  | 1.85900  |
| H | -3.30876 | 0.40698  | 1.40017  |
| S | -2.28521 | 1.73623  | -0.28815 |
| H | -4.45258 | -2.19011 | -0.60011 |
| N | -0.54387 | 2.07305  | -0.15366 |
| O | -0.04874 | 2.82410  | -0.94793 |

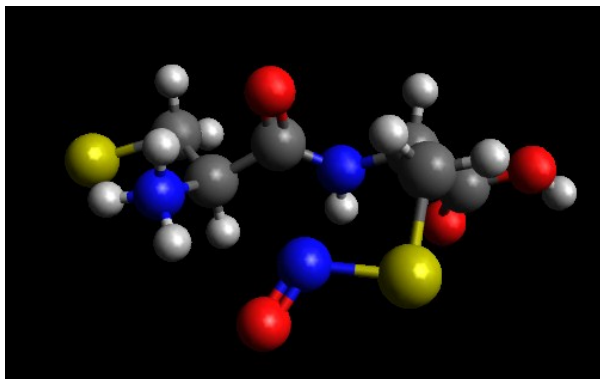

B1b  
26

|   |          |          |          |
|---|----------|----------|----------|
| C | 0.05654  | -0.63464 | 0.37986  |
| O | 0.04926  | -1.24629 | 1.44718  |
| C | -1.20057 | -0.74605 | -0.52172 |
| C | -2.11136 | 0.48949  | -0.35747 |
| N | -1.90225 | -1.97807 | -0.01502 |
| H | -0.94625 | -0.90434 | -1.56966 |
| H | -2.92377 | -1.84427 | -0.08192 |
| H | -1.64491 | -2.81938 | -0.53446 |
| H | -1.64804 | 1.33064  | -0.87273 |
| H | -2.21140 | 0.75658  | 0.70187  |
| S | -3.80023 | 0.23798  | -0.99972 |
| N | -4.61808 | 0.76665  | 0.77919  |
| O | -5.75665 | 0.83901  | 0.81856  |
| H | -1.56881 | -2.08906 | 0.96836  |
| N | 1.03464  | 0.15179  | -0.06127 |
| C | 2.25697  | 0.42704  | 0.69011  |
| H | 0.97648  | 0.62366  | -0.95927 |
| C | 2.91390  | 1.62035  | -0.00403 |
| C | 3.19954  | -0.79349 | 0.79809  |
| H | 1.99082  | 0.73349  | 1.70753  |
| O | 4.02890  | 1.99473  | 0.62516  |
| O | 2.46550  | 2.14257  | -0.99338 |
| H | 2.70894  | -1.57102 | 1.39297  |
| H | 4.10049  | -0.50969 | 1.34836  |
| S | 3.68513  | -1.55388 | -0.76694 |

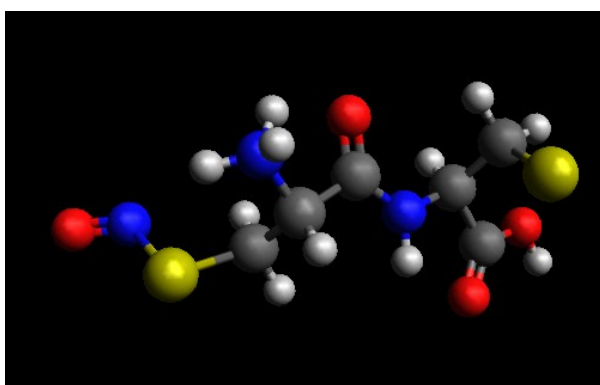

|   |         |         |         |
|---|---------|---------|---------|
| H | 4.42161 | 2.74893 | 0.15596 |
|---|---------|---------|---------|

B2a

|    |          |          |          |
|----|----------|----------|----------|
| 26 |          |          |          |
| C  | 0.15102  | -1.33543 | 0.23344  |
| O  | 0.39314  | -1.02143 | 1.39260  |
| C  | -1.06156 | -2.26303 | -0.04205 |
| C  | -2.04371 | -1.69246 | -1.08216 |
| N  | -1.73662 | -2.35328 | 1.29891  |
| H  | -0.71658 | -3.26199 | -0.32061 |
| H  | -2.13742 | -3.26753 | 1.50818  |
| H  | -2.46746 | -1.61353 | 1.31499  |
| H  | -2.86960 | -2.39405 | -1.24651 |
| H  | -1.55041 | -1.57900 | -2.04836 |
| S  | -2.79100 | -0.12115 | -0.54563 |
| H  | -1.01154 | -2.07254 | 1.99408  |
| N  | 0.81900  | -0.88683 | -0.83649 |
| C  | 1.81381  | 0.17577  | -0.75025 |
| H  | 0.59154  | -1.24277 | -1.75147 |
| C  | 3.09120  | -0.34365 | -0.06037 |
| C  | 1.26409  | 1.46799  | -0.10447 |
| H  | 2.10455  | 0.40287  | -1.77960 |
| O  | 3.91313  | 0.67557  | 0.23390  |
| O  | 3.32626  | -1.50158 | 0.13766  |
| H  | 1.97372  | 2.27385  | -0.28713 |
| H  | 1.13713  | 1.35107  | 0.97312  |
| S  | -0.36117 | 1.97167  | -0.78327 |
| H  | 4.72606  | 0.31777  | 0.62635  |
| N  | -1.00812 | 2.58169  | 1.03654  |
| O  | -2.02680 | 3.10136  | 1.06356  |

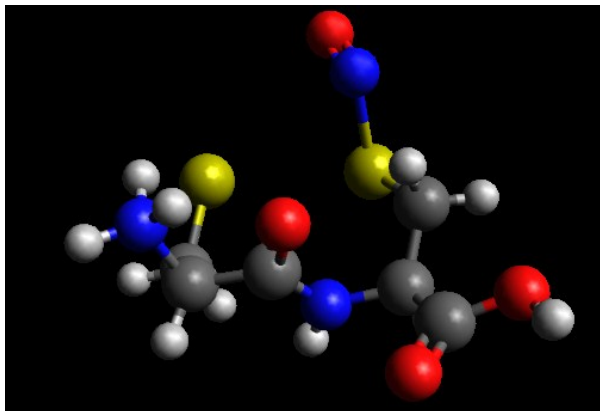

B2b

|    |          |          |          |
|----|----------|----------|----------|
| 26 |          |          |          |
| C  | 0.31793  | -0.80149 | 0.14694  |
| O  | 0.65475  | -0.93209 | 1.32045  |
| C  | -1.02078 | -1.46152 | -0.29541 |
| C  | -2.03929 | -0.55103 | -1.00405 |
| N  | -1.57566 | -2.00709 | 0.99264  |
| H  | -0.77583 | -2.31080 | -0.93821 |
| H  | -1.89118 | -2.97512 | 0.93463  |
| H  | -2.34323 | -1.39635 | 1.31512  |
| H  | -2.85561 | -1.15266 | -1.42138 |
| H  | -1.55592 | -0.04369 | -1.83899 |
| S  | -2.80668 | 0.68572  | 0.09496  |
| N  | -4.65790 | 0.03022  | -0.37318 |
| O  | -5.53573 | 0.62392  | 0.05470  |
| H  | -0.77373 | -1.89879 | 1.66783  |
| N  | 1.02405  | -0.16617 | -0.79197 |
| C  | 2.38945  | 0.31523  | -0.57144 |
| H  | 0.67872  | -0.15005 | -1.73906 |
| C  | 3.31320  | -0.89041 | -0.30824 |
| C  | 2.48471  | 1.42423  | 0.49683  |
| H  | 2.71609  | 0.74252  | -1.52301 |
| O  | 4.53979  | -0.47708 | 0.03801  |
| O  | 2.98625  | -2.03912 | -0.43915 |
| H  | 3.52320  | 1.75507  | 0.58015  |
| H  | 2.20321  | 1.04484  | 1.48269  |
| S  | 1.46910  | 2.87833  | 0.15196  |
| H  | 5.11049  | -1.25348 | 0.15718  |

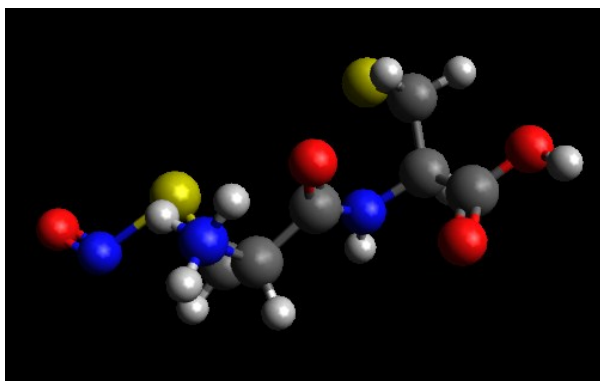

C2a

|    |         |          |         |
|----|---------|----------|---------|
| 26 |         |          |         |
| C  | 0.19206 | -1.49953 | 0.16356 |



|   |          |          |          |
|---|----------|----------|----------|
| O | 0.50461  | -1.32771 | 1.33519  |
| C | -1.01859 | -2.41535 | -0.15116 |
| C | -2.09185 | -1.73005 | -1.01998 |
| N | -1.58596 | -2.71543 | 1.20887  |
| H | -0.67989 | -3.35359 | -0.59780 |
| H | -1.95637 | -3.66001 | 1.31230  |
| H | -2.32479 | -2.00278 | 1.38291  |
| H | -2.90565 | -2.43148 | -1.23616 |
| H | -1.67295 | -1.44744 | -1.98652 |
| S | -2.84632 | -0.29020 | -0.19503 |
| H | -0.81792 | -2.51650 | 1.88436  |
| N | 0.77608  | -0.89133 | -0.87847 |
| C | 1.71985  | 0.21165  | -0.70571 |
| H | 0.51621  | -1.14656 | -1.81834 |
| C | 3.05047  | -0.31022 | -0.12839 |
| C | 1.10867  | 1.37225  | 0.10251  |
| H | 1.95260  | 0.57368  | -1.71123 |
| O | 3.80793  | 0.70897  | 0.30545  |
| O | 3.37232  | -1.46405 | -0.12120 |
| H | 1.76569  | 2.23849  | 0.03658  |
| H | 0.98498  | 1.09598  | 1.14767  |
| S | -0.52890 | 1.83944  | -0.59721 |
| H | 4.65669  | 0.35533  | 0.61763  |
| N | -0.74937 | 3.40068  | 0.68581  |
| O | -1.73035 | 3.97992  | 0.60131  |

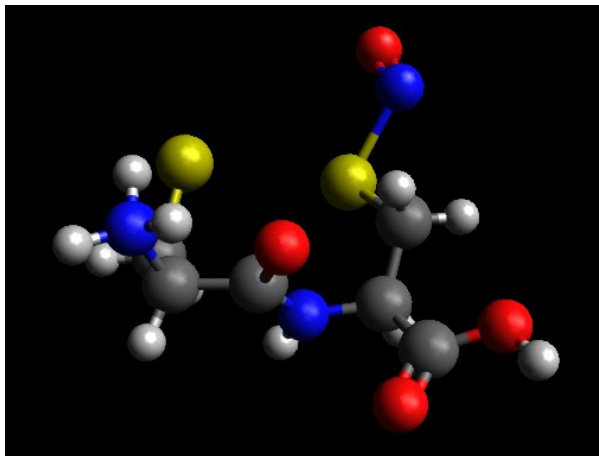

C2b

|    |          |          |          |
|----|----------|----------|----------|
| 26 |          |          |          |
| C  | 0.50419  | 1.16934  | 0.13371  |
| O  | 0.78284  | 1.36677  | -1.04621 |
| C  | -0.83551 | 1.75402  | 0.66101  |
| C  | -1.80515 | 0.66458  | 1.15401  |
| N  | -1.38016 | 2.47648  | -0.54543 |
| H  | -0.65921 | 2.49080  | 1.44771  |
| H  | -1.63468 | 3.44855  | -0.37047 |
| H  | -2.17731 | 1.96949  | -0.94475 |
| H  | -2.76371 | 1.11082  | 1.44082  |
| H  | -1.39334 | 0.18977  | 2.04448  |
| S  | -2.15469 | -0.62916 | -0.09297 |
| N  | -4.19237 | -0.09605 | -0.11274 |
| O  | -4.89218 | -0.73535 | -0.74266 |
| H  | -0.58351 | 2.39462  | -1.23980 |
| N  | 1.21668  | 0.42907  | 0.98296  |
| C  | 2.21581  | -0.53412 | 0.51321  |
| H  | 0.87310  | 0.29864  | 1.92192  |
| C  | 3.43793  | 0.20247  | -0.05844 |
| C  | 1.57695  | -1.57400 | -0.43503 |
| H  | 2.57417  | -1.05669 | 1.40403  |
| O  | 4.21240  | -0.65123 | -0.74827 |
| O  | 3.68703  | 1.35953  | 0.13004  |
| H  | 2.28443  | -2.38447 | -0.62672 |
| H  | 1.33940  | -1.13225 | -1.40441 |
| S  | 0.07620  | -2.34784 | 0.25254  |
| H  | 5.00155  | -0.17533 | -1.05361 |

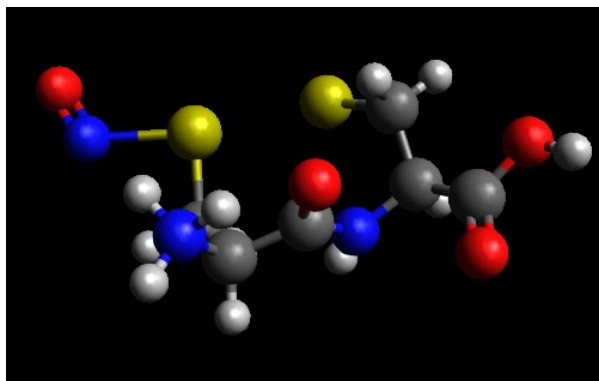

E1

|    |          |          |          |
|----|----------|----------|----------|
| 24 |          |          |          |
| C  | 0.21708  | -1.20258 | 0.16368  |
| O  | -0.13616 | -1.51200 | -0.96876 |
| C  | 1.68726  | -1.48561 | 0.56517  |
| C  | 2.44314  | -0.16288 | 0.80178  |
| N  | 2.22166  | -2.23759 | -0.63412 |
| H  | 1.76321  | -2.13876 | 1.43691  |

|   |          |          |          |
|---|----------|----------|----------|
| H | 2.51122  | -3.19244 | -0.41824 |
| H | 2.99357  | -1.75180 | -1.09613 |
| H | 3.52312  | -0.33921 | 0.82314  |
| H | 2.17464  | 0.24529  | 1.77650  |
| S | 2.16413  | 1.13250  | -0.49273 |
| H | 1.38463  | -2.24402 | -1.28594 |
| N | -0.51285 | -0.50254 | 1.03810  |
| C | -1.56785 | 0.40322  | 0.57938  |
| H | -0.11468 | -0.30123 | 1.94294  |
| C | -2.79580 | -0.38805 | 0.09693  |
| C | -1.00978 | 1.41548  | -0.44615 |
| H | -1.90239 | 0.95243  | 1.46360  |
| O | -3.61176 | 0.41296  | -0.60842 |
| O | -3.01029 | -1.53553 | 0.36116  |
| H | -1.73208 | 2.21685  | -0.60718 |
| H | -0.80397 | 0.95029  | -1.40872 |
| S | 0.51502  | 2.27207  | 0.15310  |
| H | -4.40391 | -0.09060 | -0.85699 |

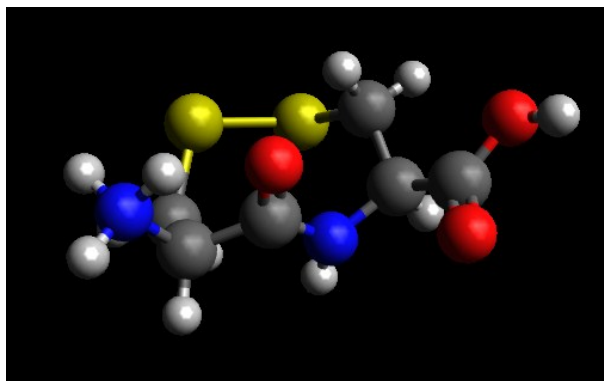

|    |          |          |          |
|----|----------|----------|----------|
| E2 |          |          |          |
| 24 |          |          |          |
| C  | 0.28296  | -1.17565 | 0.22175  |
| O  | -0.09179 | -1.47601 | -0.96333 |
| C  | 1.74125  | -1.49062 | 0.56712  |
| C  | 2.46211  | -0.12685 | 0.75642  |
| N  | 2.24082  | -2.27569 | -0.56260 |
| H  | 1.79147  | -2.05465 | 1.50359  |
| H  | 2.44296  | -3.24017 | -0.32332 |
| H  | 3.05670  | -1.87065 | -1.00883 |
| H  | 3.54233  | -0.28981 | 0.72701  |
| H  | 2.22833  | 0.30533  | 1.72978  |
| S  | 2.11343  | 1.14487  | -0.54877 |
| H  | 0.72302  | -1.95985 | -1.34143 |
| N  | -0.48214 | -0.48826 | 1.02714  |
| C  | -1.57707 | 0.39148  | 0.57953  |
| H  | -0.10455 | -0.28956 | 1.94408  |
| C  | -2.77356 | -0.43579 | 0.08232  |
| C  | -1.04089 | 1.43512  | -0.42727 |
| H  | -1.91882 | 0.91456  | 1.47576  |
| O  | -3.68842 | 0.37904  | -0.45862 |
| O  | -2.87224 | -1.62300 | 0.20186  |
| H  | -1.78094 | 2.22744  | -0.54800 |
| H  | -0.85314 | 0.99981  | -1.40782 |
| S  | 0.49110  | 2.28785  | 0.16190  |
| H  | -4.45995 | -0.14462 | -0.73127 |

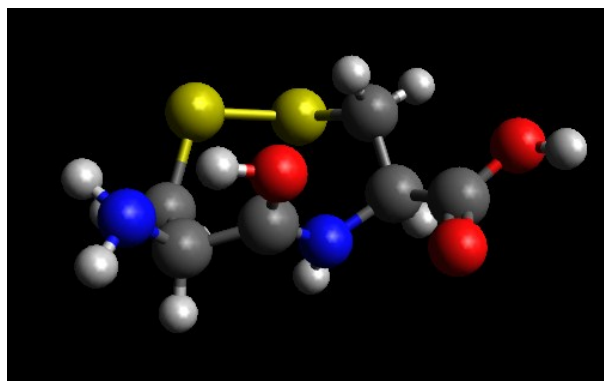

|    |          |          |          |
|----|----------|----------|----------|
| E3 |          |          |          |
| 24 |          |          |          |
| C  | 0.34929  | -1.23903 | 0.26117  |
| O  | -0.06186 | -1.79256 | -0.81037 |
| C  | 1.81211  | -1.39689 | 0.64009  |
| C  | 2.45223  | 0.03333  | 0.72069  |
| N  | 2.43984  | -2.35692 | -0.22624 |
| H  | 1.83003  | -1.81102 | 1.65741  |
| H  | 3.33332  | -2.67157 | 0.12980  |
| H  | 2.54023  | -2.04413 | -1.18538 |
| H  | 3.53638  | -0.08649 | 0.67437  |
| H  | 2.22425  | 0.54202  | 1.65999  |
| S  | 2.02638  | 1.17698  | -0.66867 |
| H  | -1.07338 | -1.71677 | -0.92168 |
| N  | -0.42861 | -0.47665 | 1.02210  |
| C  | -1.55545 | 0.37774  | 0.58096  |
| H  | 0.02056  | -0.11796 | 1.85533  |

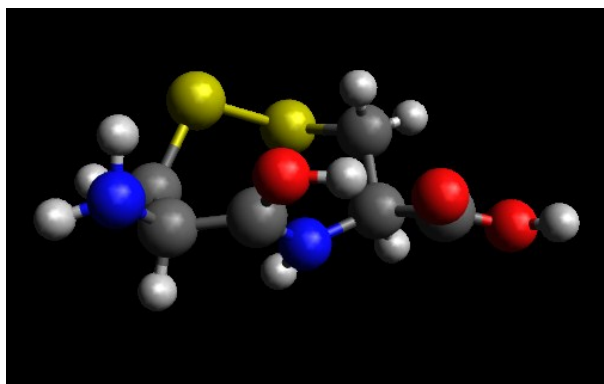

|   |          |          |          |
|---|----------|----------|----------|
| C | -2.71482 | -0.43042 | 0.00782  |
| C | -1.08292 | 1.43207  | -0.45645 |
| H | -1.90752 | 0.88701  | 1.47696  |
| O | -3.88386 | 0.08935  | 0.31853  |
| O | -2.56925 | -1.40692 | -0.70758 |
| H | -1.86071 | 2.19108  | -0.56800 |
| H | -0.90325 | 0.98360  | -1.43435 |
| S | 0.43237  | 2.34219  | 0.06042  |
| H | -4.60151 | -0.40723 | -0.11370 |

E4  
24

|   |          |          |          |
|---|----------|----------|----------|
| C | 0.34384  | -1.24198 | 0.28045  |
| O | -0.08185 | -1.85308 | -0.75711 |
| C | 1.82694  | -1.39633 | 0.64287  |
| C | 2.45714  | 0.02379  | 0.73179  |
| N | 2.58301  | -2.24063 | -0.23863 |
| H | 1.86251  | -1.83654 | 1.64823  |
| H | 2.55009  | -1.94496 | -1.20831 |
| H | 2.32817  | -3.21919 | -0.18288 |
| H | 3.53942  | -0.10448 | 0.68401  |
| H | 2.22507  | 0.53217  | 1.66856  |
| S | 2.02798  | 1.16143  | -0.66297 |
| H | -1.09476 | -1.77093 | -0.86521 |
| N | -0.42581 | -0.45397 | 1.02062  |
| C | -1.55972 | 0.39031  | 0.57371  |
| H | 0.04546  | -0.05130 | 1.82181  |
| C | -2.71765 | -0.42311 | 0.00839  |
| C | -1.08249 | 1.43854  | -0.46764 |
| H | -1.91396 | 0.90527  | 1.46587  |
| O | -3.88340 | 0.12456  | 0.27966  |
| O | -2.57725 | -1.42840 | -0.66809 |
| H | -1.85563 | 2.20146  | -0.58353 |
| H | -0.90194 | 0.98412  | -1.44275 |
| S | 0.43755  | 2.34174  | 0.05135  |
| H | -4.60166 | -0.37591 | -0.14698 |

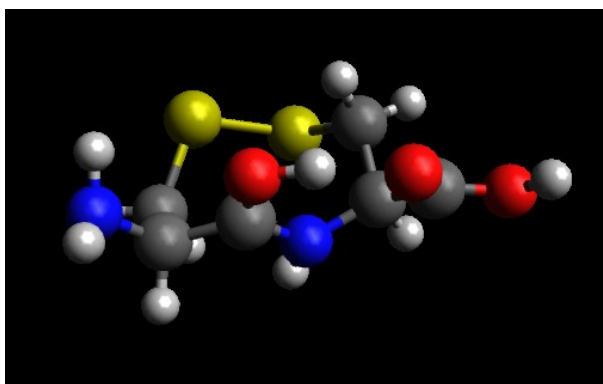

E5  
24

|   |          |          |          |
|---|----------|----------|----------|
| C | 0.03494  | 1.17104  | 0.23067  |
| O | 0.74571  | 1.38135  | -0.74213 |
| C | -1.37003 | 1.75698  | 0.42652  |
| C | -2.37540 | 0.59454  | 0.64426  |
| N | -1.80796 | 2.61796  | -0.64285 |
| H | -1.35408 | 2.34360  | 1.35420  |
| H | -1.74202 | 2.16759  | -1.55023 |
| H | -1.28514 | 3.48488  | -0.68448 |
| H | -3.37749 | 1.01015  | 0.52531  |
| H | -2.31421 | 0.15981  | 1.64317  |
| S | -2.28536 | -0.77668 | -0.59411 |
| N | 0.52518  | 0.29282  | 1.18980  |
| C | 1.39703  | -0.72776 | 0.61166  |
| H | -0.12156 | -0.05984 | 1.88441  |
| C | 2.53758  | 0.02794  | -0.02831 |
| C | 0.68272  | -1.70178 | -0.36184 |
| H | 1.84597  | -1.29273 | 1.43806  |
| O | 3.06353  | -0.43859 | -1.09977 |
| O | 3.17145  | 0.97174  | 0.58478  |
| H | 1.26285  | -2.62135 | -0.45876 |
| H | 0.56963  | -1.26129 | -1.35064 |
| S | -0.98281 | -2.20571 | 0.23986  |
| H | 3.82823  | 0.08534  | -1.40452 |
| H | 2.67141  | 1.28478  | 1.36204  |

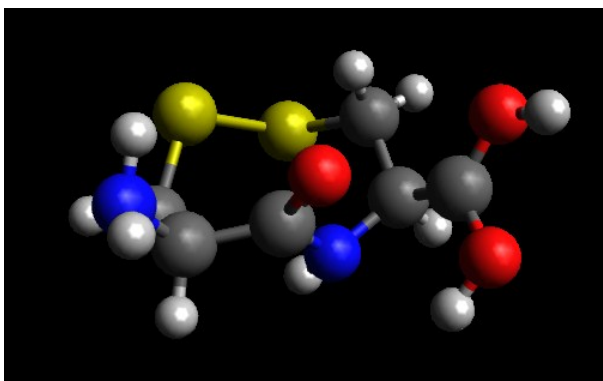

| E6 |          |          |          |
|----|----------|----------|----------|
| 24 |          |          |          |
| C  | 0.26479  | -1.30446 | -0.02008 |
| O  | -0.29488 | -1.59518 | -1.01241 |
| C  | 1.71331  | -1.56052 | 0.41196  |
| C  | 2.41848  | -0.22912 | 0.77297  |
| N  | 2.46542  | -2.29263 | -0.56623 |
| H  | 1.65787  | -2.16440 | 1.33015  |
| H  | 2.53232  | -1.81267 | -1.45807 |
| H  | 2.11967  | -3.23200 | -0.72330 |
| H  | 3.48715  | -0.44652 | 0.81738  |
| H  | 2.12677  | 0.16730  | 1.74729  |
| S  | 2.22287  | 1.10649  | -0.48524 |
| N  | -0.61913 | -0.55612 | 1.07584  |
| C  | -1.56132 | 0.49501  | 0.52162  |
| H  | -0.02924 | -0.14458 | 1.80159  |
| C  | -2.80786 | -0.28020 | 0.06515  |
| C  | -0.89702 | 1.44018  | -0.48008 |
| H  | -1.87865 | 1.07584  | 1.39433  |
| O  | -3.54217 | 0.41401  | -0.78954 |
| O  | -3.06339 | -1.36656 | 0.51936  |
| H  | -1.59884 | 2.24739  | -0.69504 |
| H  | -0.64720 | 0.95552  | -1.42202 |
| S  | 0.60911  | 2.24816  | 0.22261  |
| H  | -4.34934 | -0.08177 | -1.01123 |
| H  | -1.23498 | -1.28088 | 1.48495  |

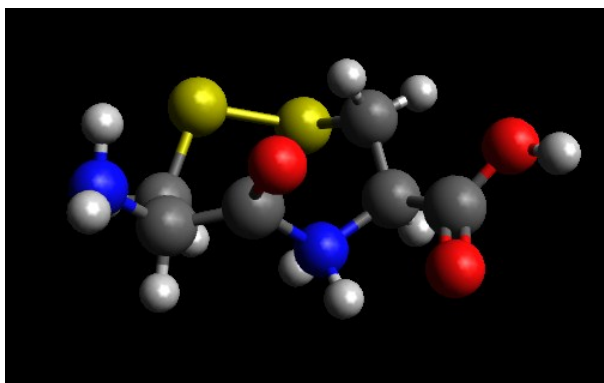

| F1 |          |          |          |
|----|----------|----------|----------|
| 24 |          |          |          |
| C  | 0.24166  | -1.18477 | 0.23614  |
| O  | -0.09343 | -1.52256 | -0.92760 |
| C  | 1.71273  | -1.50027 | 0.57473  |
| C  | 2.46978  | -0.16713 | 0.77482  |
| N  | 2.13313  | -2.25421 | -0.63155 |
| H  | 1.79976  | -2.12333 | 1.46765  |
| H  | 2.36653  | -3.22593 | -0.44664 |
| H  | 2.89601  | -1.81748 | -1.14325 |
| H  | 3.54737  | -0.35026 | 0.75133  |
| H  | 2.24019  | 0.25854  | 1.75225  |
| S  | 2.15492  | 1.11683  | -0.52599 |
| H  | 0.93692  | -2.05224 | -1.20383 |
| N  | -0.50628 | -0.47451 | 1.05131  |
| C  | -1.57395 | 0.41890  | 0.57770  |
| H  | -0.11682 | -0.25587 | 1.95769  |
| C  | -2.78410 | -0.39004 | 0.08307  |
| C  | -1.00736 | 1.43076  | -0.44477 |
| H  | -1.91714 | 0.96693  | 1.45865  |
| O  | -3.65441 | 0.42669  | -0.52788 |
| O  | -2.93289 | -1.56452 | 0.26039  |
| H  | -1.72950 | 2.23369  | -0.59854 |
| H  | -0.80918 | 0.96833  | -1.41074 |
| S  | 0.52797  | 2.27211  | 0.15239  |
| H  | -4.43508 | -0.08598 | -0.79466 |

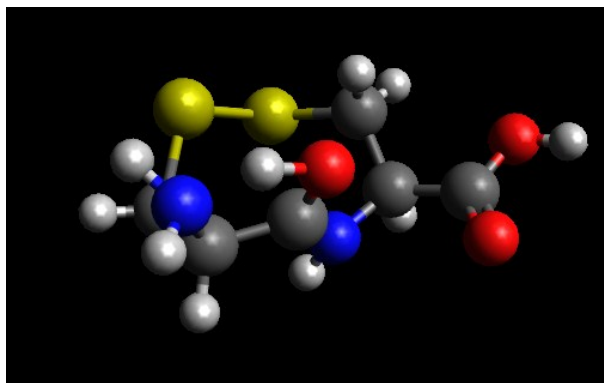

| F2 |          |          |          |
|----|----------|----------|----------|
| 24 |          |          |          |
| C  | 0.33221  | -1.15675 | 0.20304  |
| O  | -0.06923 | -1.37208 | -1.03014 |
| C  | 1.76425  | -1.46408 | 0.58722  |
| C  | 2.48829  | -0.06588 | 0.67981  |
| N  | 2.29876  | -2.44472 | -0.32290 |
| H  | 1.76769  | -1.89790 | 1.59369  |
| H  | 3.11434  | -2.91220 | 0.05325  |

|   |          |          |          |
|---|----------|----------|----------|
| H | 2.51865  | -2.06636 | -1.23825 |
| H | 3.56016  | -0.23787 | 0.55927  |
| H | 2.33500  | 0.40061  | 1.65510  |
| S | 2.05684  | 1.17506  | -0.62855 |
| H | -0.53426 | -2.21754 | -1.15409 |
| N | -0.42109 | -0.46595 | 1.00485  |
| C | -1.56718 | 0.37244  | 0.59740  |
| H | -0.03096 | -0.25000 | 1.91611  |
| C | -2.72503 | -0.48749 | 0.07386  |
| C | -1.08307 | 1.45865  | -0.39667 |
| H | -1.91558 | 0.85974  | 1.50980  |
| O | -3.78031 | 0.29052  | -0.16733 |
| O | -2.67951 | -1.67862 | -0.08307 |
| H | -1.84146 | 2.24045  | -0.46052 |
| H | -0.92312 | 1.05094  | -1.39345 |
| S | 0.46187  | 2.31225  | 0.15700  |
| H | -4.51789 | -0.25210 | -0.49336 |

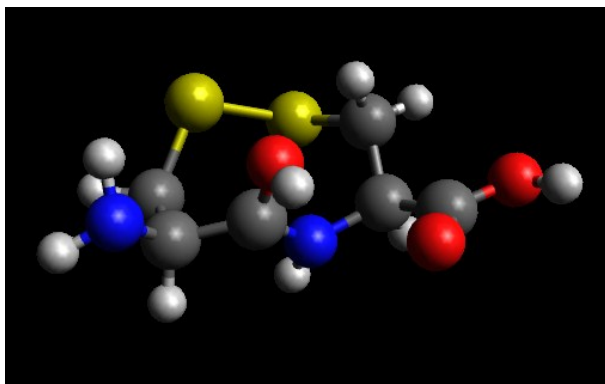

|    |          |          |          |
|----|----------|----------|----------|
| F3 |          |          |          |
| 24 |          |          |          |
| C  | 0.34176  | -1.22923 | 0.27336  |
| O  | -0.08024 | -1.80149 | -0.78745 |
| C  | 1.79360  | -1.40117 | 0.66349  |
| C  | 2.45271  | 0.01008  | 0.71979  |
| N  | 2.48243  | -2.34309 | -0.18462 |
| H  | 1.77648  | -1.77485 | 1.70316  |
| H  | 3.36838  | -2.00551 | -0.53374 |
| H  | 1.93054  | -2.71923 | -0.94318 |
| H  | 3.53687  | -0.11896 | 0.68589  |
| H  | 2.23024  | 0.52835  | 1.65423  |
| S  | 2.03279  | 1.14341  | -0.68077 |
| H  | -1.09831 | -1.72446 | -0.89284 |
| N  | -0.43505 | -0.46499 | 1.03213  |
| C  | -1.55422 | 0.39404  | 0.58183  |
| H  | 0.01978  | -0.10067 | 1.86068  |
| C  | -2.71380 | -0.41089 | 0.00595  |
| C  | -1.06888 | 1.44263  | -0.45735 |
| H  | -1.90886 | 0.90854  | 1.47381  |
| O  | -3.88088 | 0.12333  | 0.29239  |
| O  | -2.56901 | -1.40076 | -0.69335 |
| H  | -1.83738 | 2.21100  | -0.56838 |
| H  | -0.89618 | 0.99049  | -1.43486 |
| S  | 0.45968  | 2.33363  | 0.05508  |
| H  | -4.59859 | -0.37213 | -0.14139 |

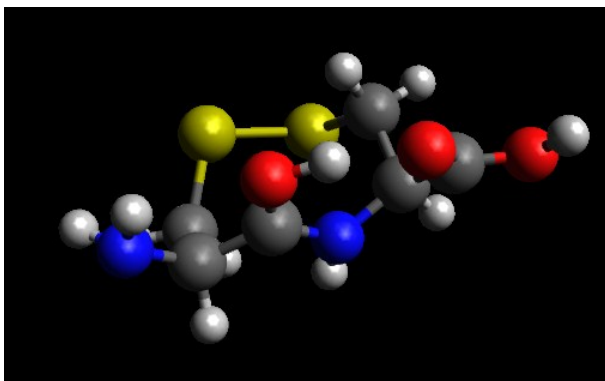

|    |          |          |          |
|----|----------|----------|----------|
| F4 |          |          |          |
| 24 |          |          |          |
| C  | -0.21736 | 1.25442  | 0.12714  |
| O  | 0.32730  | 1.57619  | -0.91112 |
| C  | -1.68410 | 1.56206  | 0.46836  |
| C  | -2.44453 | 0.23689  | 0.73625  |
| N  | -2.36365 | 2.34466  | -0.53517 |
| H  | -1.69740 | 2.12807  | 1.40911  |
| H  | -2.24939 | 1.94971  | -1.46366 |
| H  | -2.03277 | 3.30202  | -0.56640 |
| H  | -3.51101 | 0.46717  | 0.71641  |
| H  | -2.21403 | -0.19928 | 1.70919  |
| S  | -2.21435 | -1.07380 | -0.54531 |
| H  | 2.18171  | 1.95481  | 0.44742  |
| N  | 0.52105  | 0.52771  | 1.07259  |
| C  | 1.47223  | -0.45720 | 0.57760  |
| H  | 0.01530  | 0.21033  | 1.88955  |
| C  | 2.71708  | 0.20941  | 0.05799  |

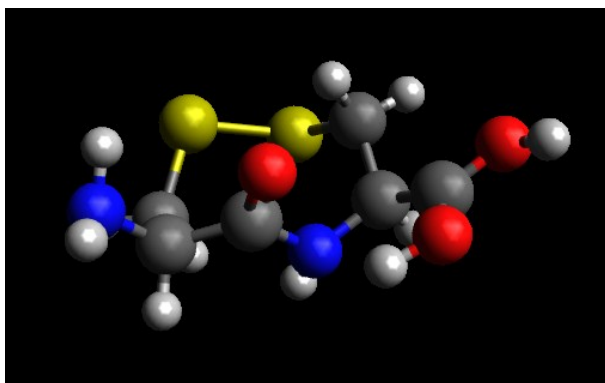

|   |          |          |          |
|---|----------|----------|----------|
| C | 0.88579  | -1.47538 | -0.45431 |
| H | 1.82499  | -1.03345 | 1.44245  |
| O | 3.61403  | -0.54806 | -0.45928 |
| O | 2.96959  | 1.45698  | 0.14508  |
| H | 1.60326  | -2.28061 | -0.62019 |
| H | 0.67178  | -0.98872 | -1.40449 |
| S | -0.64539 | -2.26505 | 0.18111  |
| H | 4.39941  | -0.05709 | -0.76982 |

F5  
24

|   |          |          |          |
|---|----------|----------|----------|
| C | 0.23043  | -1.27104 | -0.04517 |
| O | -0.21179 | -1.46412 | -1.13823 |
| C | 1.65547  | -1.57267 | 0.43123  |
| C | 2.36137  | -0.25294 | 0.84071  |
| N | 2.44454  | -2.29170 | -0.53467 |
| H | 1.57576  | -2.18844 | 1.33831  |
| H | 2.48626  | -1.81299 | -1.42918 |
| H | 2.10292  | -3.23200 | -0.69722 |
| H | 3.42305  | -0.48232 | 0.94605  |
| H | 2.00761  | 0.14818  | 1.79166  |
| S | 2.26095  | 1.09139  | -0.42046 |
| N | -0.68431 | -0.67862 | 0.95729  |
| C | -1.50208 | 0.48788  | 0.49143  |
| H | -0.24574 | -0.50643 | 1.85799  |
| C | -2.79129 | -0.21121 | 0.06820  |
| C | -0.85820 | 1.45031  | -0.51443 |
| H | -1.76381 | 1.05888  | 1.38971  |
| O | -3.68563 | 0.44483  | -0.58746 |
| O | -2.90095 | -1.39191 | 0.44779  |
| H | -1.56579 | 2.25738  | -0.71731 |
| H | -0.60803 | 0.96788  | -1.45694 |
| S | 0.63661  | 2.26102  | 0.19964  |
| H | -4.47636 | -0.09395 | -0.77739 |
| H | -1.80554 | -1.45500 | 0.92034  |

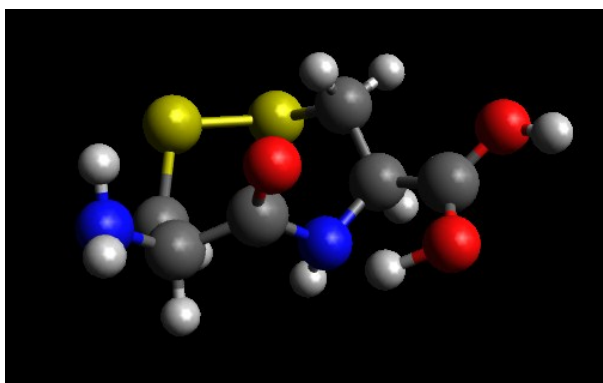

F6  
24

|   |          |          |          |
|---|----------|----------|----------|
| C | -0.52104 | 1.65979  | 0.03982  |
| O | 0.06760  | 2.27716  | -0.71024 |
| C | -2.51356 | 1.36300  | 0.41607  |
| C | -2.52949 | -0.07642 | 0.84565  |
| N | -3.14483 | 1.72619  | -0.69629 |
| H | -2.52559 | 2.10330  | 1.21110  |
| H | -3.24576 | 1.07478  | -1.46598 |
| H | -3.32193 | 2.69988  | -0.90210 |
| H | -3.55501 | -0.29937 | 1.15949  |
| H | -1.87650 | -0.23174 | 1.70023  |
| S | -2.09434 | -1.28611 | -0.48716 |
| N | 0.95233  | 0.49133  | 1.30714  |
| C | 1.81613  | -0.43533 | 0.55844  |
| H | 0.48681  | 0.01308  | 2.07125  |
| C | 2.98259  | 0.37529  | -0.01841 |
| C | 1.05690  | -1.22523 | -0.52042 |
| H | 2.27926  | -1.15968 | 1.24241  |
| O | 3.71600  | -0.35026 | -0.86984 |
| O | 3.21373  | 1.51362  | 0.29513  |
| H | 1.73172  | -1.94691 | -0.98039 |
| H | 0.66531  | -0.58138 | -1.30748 |
| S | -0.34364 | -2.22151 | 0.16470  |
| H | 4.46855  | 0.18427  | -1.17215 |
| H | 1.52046  | 1.25221  | 1.67984  |

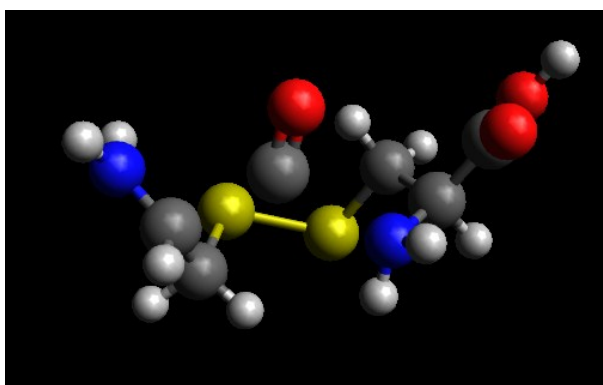

G1  
22

|   |          |          |          |
|---|----------|----------|----------|
| C | 3.07785  | -1.39008 | 0.41336  |
| C | 2.23438  | -0.28619 | 0.83651  |
| N | 3.33695  | -1.68427 | -0.82137 |
| H | 3.49961  | -2.05185 | 1.16735  |
| H | 2.98022  | -1.10051 | -1.57689 |
| H | 3.88889  | -2.49744 | -1.07243 |
| H | 2.56286  | 0.09922  | 1.80442  |
| H | 1.19604  | -0.72437 | 0.98140  |
| S | 2.02310  | 1.03421  | -0.42831 |
| N | -0.70475 | -1.12617 | 0.83283  |
| C | -1.67000 | -0.06625 | 0.50471  |
| H | -0.95489 | -1.53840 | 1.72861  |
| C | -2.94624 | -0.66832 | -0.10474 |
| C | -1.10117 | 0.96071  | -0.49103 |
| H | -1.94667 | 0.46058  | 1.42021  |
| O | -3.96688 | 0.19960  | -0.07452 |
| O | -2.99991 | -1.77569 | -0.57471 |
| H | -1.87386 | 1.68716  | -0.75242 |
| H | -0.75980 | 0.48483  | -1.41203 |
| S | 0.27148  | 1.98148  | 0.19154  |
| H | -4.74316 | -0.21002 | -0.49049 |
| H | -0.82263 | -1.87762 | 0.15132  |

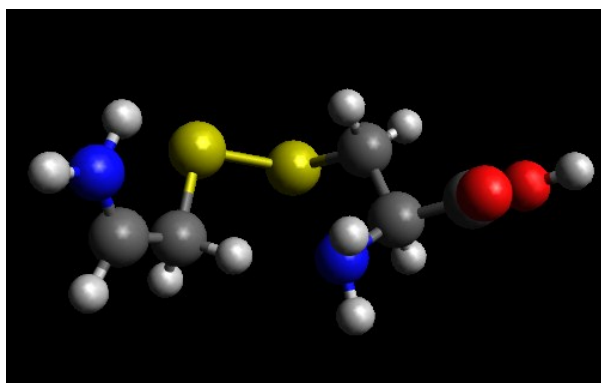

G2  
22

|   |          |          |          |
|---|----------|----------|----------|
| C | -2.68569 | 1.31259  | 0.39732  |
| N | -1.93011 | 1.95256  | -0.42701 |
| C | -2.12115 | 0.37455  | 1.37091  |
| S | -2.02509 | -1.31266 | 0.50971  |
| S | -0.92884 | -0.99954 | -1.21930 |
| C | 0.84120  | -1.00700 | -0.71213 |
| C | 1.30938  | 0.18818  | 0.13464  |
| C | 2.83944  | 0.14621  | 0.29900  |
| O | 3.56823  | 1.04274  | -0.02956 |
| N | 0.86741  | 1.48249  | -0.41196 |
| O | 3.23583  | -1.00266 | 0.86590  |
| H | -3.76352 | 1.41252  | 0.30024  |
| H | -0.86820 | 1.83403  | -0.41651 |
| H | -2.34510 | 2.53078  | -1.15125 |
| H | -2.79693 | 0.19371  | 2.20614  |
| H | -1.13942 | 0.66712  | 1.73284  |
| H | 1.37503  | 2.22274  | 0.07262  |
| H | 0.89914  | 0.07749  | 1.14360  |
| H | 1.06420  | -1.94062 | -0.19930 |
| H | 1.35695  | -1.02495 | -1.67888 |
| H | 4.20201  | -0.99032 | 0.96573  |
| H | 1.18611  | 1.55947  | -1.37824 |

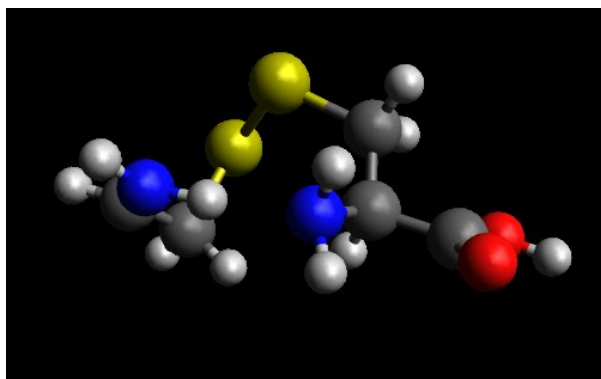

G3  
22

|   |          |          |          |
|---|----------|----------|----------|
| C | -2.23356 | 1.56522  | -0.03220 |
| C | -2.09083 | 0.49505  | 0.95459  |
| N | -1.21657 | 2.20035  | -0.51117 |
| H | -3.21195 | 1.80102  | -0.44235 |
| H | -0.24809 | 2.01535  | -0.19526 |
| H | -2.96681 | 0.41731  | 1.59931  |
| H | -1.15618 | 0.52545  | 1.51852  |
| S | -2.11735 | -1.10024 | -0.04257 |
| H | -1.33558 | 2.87862  | -1.25632 |
| N | 0.88410  | -0.19372 | 1.93487  |
| C | 1.71769  | -0.62088 | 0.81245  |

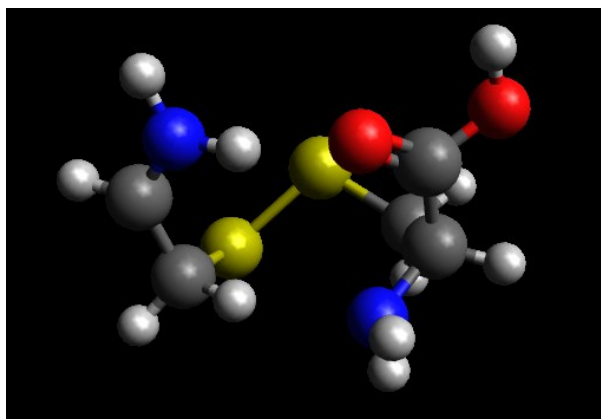

S23



|   |          |          |          |
|---|----------|----------|----------|
| H | 0.71080  | -0.98476 | 2.54959  |
| C | 2.10500  | 0.58978  | -0.03035 |
| C | 0.99370  | -1.67185 | -0.05681 |
| H | 2.65988  | -1.09163 | 1.12573  |
| O | 3.19318  | 0.34934  | -0.75678 |
| O | 1.50200  | 1.64370  | -0.06389 |
| H | 0.60598  | -2.47408 | 0.57279  |
| H | 1.70126  | -2.11433 | -0.76226 |
| S | -0.36445 | -1.07112 | -1.15663 |
| H | 3.39907  | 1.12667  | -1.30207 |
| H | 1.36426  | 0.50745  | 2.49282  |

G4  
22

|   |          |          |          |
|---|----------|----------|----------|
| C | -1.83120 | 1.60831  | 0.40147  |
| C | -1.68464 | 0.32484  | 1.10134  |
| N | -2.19459 | 1.72576  | -0.82606 |
| H | -1.60970 | 2.52378  | 0.94438  |
| H | -2.40781 | 0.88933  | -1.37005 |
| H | -2.41212 | 0.28547  | 1.92309  |
| H | -0.68291 | 0.30858  | 1.57994  |
| S | -1.88166 | -1.21413 | 0.12441  |
| H | -2.25761 | 2.62840  | -1.28415 |
| N | 1.19648  | -0.35143 | 1.93477  |
| C | 1.88480  | -0.46526 | 0.64864  |
| H | 1.25132  | -1.23124 | 2.44028  |
| C | 1.81366  | 0.87572  | -0.08242 |
| C | 1.26909  | -1.58735 | -0.21723 |
| H | 2.95007  | -0.71133 | 0.75435  |
| O | 2.71889  | 0.93158  | -1.06424 |
| O | 1.03661  | 1.76777  | 0.17154  |
| H | 1.07231  | -2.47118 | 0.39202  |
| H | 1.97429  | -1.87293 | -1.00168 |
| S | -0.23858 | -1.17574 | -1.19333 |
| H | 2.64091  | 1.78259  | -1.52441 |
| H | 1.63767  | 0.35396  | 2.51861  |

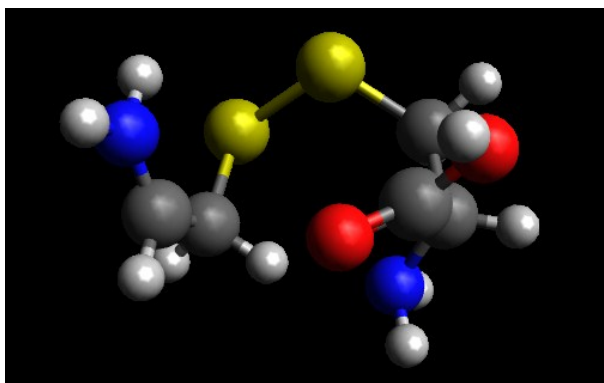

H1  
22

|   |          |          |          |
|---|----------|----------|----------|
| C | -2.10134 | 1.88842  | -0.30086 |
| C | -1.79041 | 0.97270  | 0.79871  |
| N | -2.62309 | 1.50028  | -1.41359 |
| H | -1.86868 | 2.94666  | -0.19581 |
| H | -2.88873 | 0.51280  | -1.50141 |
| H | -2.81853 | 2.13816  | -2.17793 |
| H | -2.21411 | 1.37219  | 1.72857  |
| H | -0.67716 | 0.96651  | 1.01182  |
| S | -2.35589 | -0.74168 | 0.58903  |
| N | 1.00892  | 0.27717  | 1.55206  |
| C | 1.64683  | -0.44018 | 0.44360  |
| H | 0.83106  | -0.34442 | 2.33415  |
| C | 2.84065  | 0.37947  | -0.05877 |
| C | 0.66841  | -0.69034 | -0.72211 |
| H | 2.04262  | -1.41002 | 0.76216  |
| O | 3.47579  | -0.24282 | -1.06264 |
| O | 3.15900  | 1.44882  | 0.39245  |
| H | 1.18238  | -1.21115 | -1.53451 |
| H | 0.29728  | 0.25026  | -1.13600 |
| S | -0.71364 | -1.83891 | -0.36401 |
| H | 4.23705  | 0.29508  | -1.33478 |
| H | 1.62527  | 1.02281  | 1.87217  |

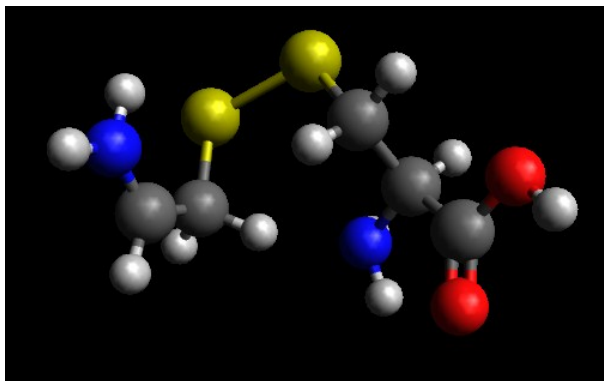



H2  
22

|   |          |          |          |
|---|----------|----------|----------|
| C | -2.82829 | 1.30815  | 0.14029  |
| N | -1.86591 | 1.97922  | -0.39445 |
| C | -2.55820 | 0.24568  | 1.11167  |
| S | -2.31175 | -1.31485 | 0.07948  |
| S | -0.61078 | -0.93514 | -1.04419 |
| C | 0.77955  | -1.11933 | 0.15242  |
| C | 1.50437  | 0.19625  | 0.61124  |
| C | 2.94704  | 0.16854  | 0.08753  |
| O | 3.35246  | 0.89588  | -0.78116 |
| N | 0.85656  | 1.45963  | 0.20553  |
| O | 3.67003  | -0.78008 | 0.69631  |
| H | -3.84234 | 1.48086  | -0.20984 |
| H | -0.85357 | 1.79200  | -0.12661 |
| H | -2.05881 | 2.64269  | -1.13808 |
| H | -3.42257 | 0.02246  | 1.73592  |
| H | -1.67735 | 0.42357  | 1.72475  |
| H | 1.17839  | 2.18870  | 0.84054  |
| H | 1.55090  | 0.17188  | 1.70146  |
| H | 0.39387  | -1.66354 | 1.01315  |
| H | 1.48487  | -1.78486 | -0.34633 |
| H | 4.56618  | -0.78932 | 0.32119  |
| H | 1.25966  | 1.72134  | -0.69845 |

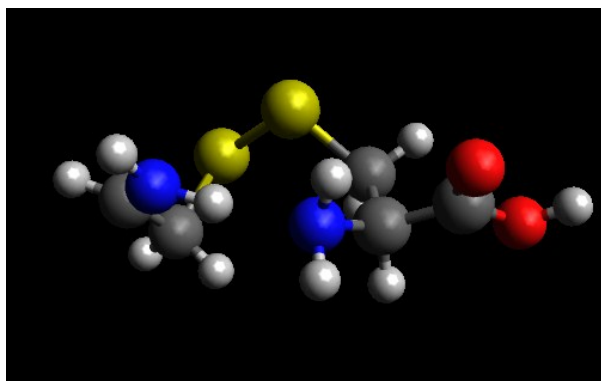

H3  
22

|   |          |          |          |
|---|----------|----------|----------|
| C | -2.04173 | 1.69090  | 0.25665  |
| C | -1.91843 | 0.41774  | 0.97170  |
| N | -1.62809 | 1.90171  | -0.94377 |
| H | -2.46247 | 2.54663  | 0.78199  |
| H | -1.16954 | 1.15492  | -1.47043 |
| H | -2.67711 | 0.35095  | 1.75470  |
| H | -0.91659 | 0.42255  | 1.48008  |
| S | -2.00393 | -1.15728 | 0.02825  |
| H | -1.67435 | 2.82254  | -1.36625 |
| N | 0.89737  | -0.23936 | 1.95600  |
| C | 1.74838  | -0.54036 | 0.80257  |
| H | 0.83017  | -1.05392 | 2.56057  |
| C | 1.97788  | 0.73613  | -0.00265 |
| C | 1.13442  | -1.63856 | -0.08553 |
| H | 2.74146  | -0.90907 | 1.09589  |
| O | 2.95309  | 0.56139  | -0.90436 |
| O | 1.35788  | 1.76245  | 0.13711  |
| H | 0.82000  | -2.49027 | 0.51996  |
| H | 1.87978  | -1.99108 | -0.80206 |
| S | -0.27936 | -1.15355 | -1.17010 |
| H | 3.08344  | 1.38658  | -1.39832 |
| H | 1.30218  | 0.51129  | 2.50933  |

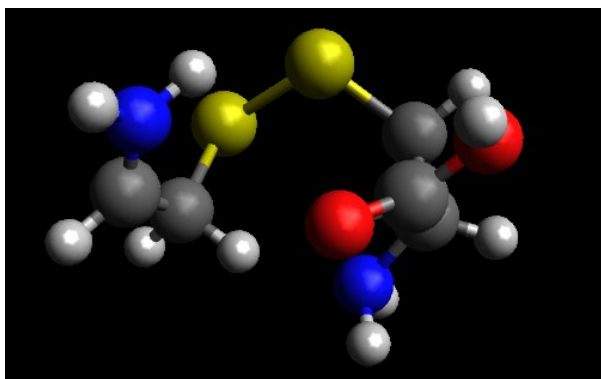

H4  
22

|   |          |          |          |
|---|----------|----------|----------|
| C | -2.14084 | 1.61910  | 0.12889  |
| C | -1.85592 | 0.46966  | 0.89443  |
| N | -2.18162 | 1.68593  | -1.18056 |
| H | -2.28068 | 2.56346  | 0.65029  |
| H | -2.10536 | 0.84688  | -1.74404 |
| H | -2.30342 | 0.48729  | 1.88832  |
| H | -0.53062 | 0.51981  | 1.28459  |
| S | -1.96737 | -1.18121 | 0.15638  |
| H | -2.31566 | 2.56468  | -1.66043 |
| N | 0.71104  | 0.35349  | 1.78551  |
| C | 1.69378  | -0.31532 | 0.89302  |

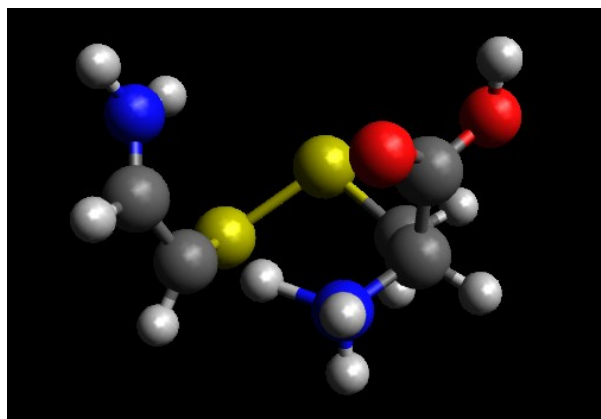

S25

|   |          |          |          |
|---|----------|----------|----------|
| H | 0.61160  | -0.15959 | 2.66053  |
| C | 2.14550  | 0.72422  | -0.13408 |
| C | 1.13665  | -1.59837 | 0.26607  |
| H | 2.58307  | -0.58929 | 1.47495  |
| O | 2.97780  | 0.19205  | -1.02999 |
| O | 1.80558  | 1.87935  | -0.09579 |
| H | 0.77479  | -2.28379 | 1.03470  |
| H | 1.93721  | -2.09962 | -0.28103 |
| S | -0.19078 | -1.33588 | -0.98018 |
| H | 3.27408  | 0.88341  | -1.64443 |
| H | 1.03752  | 1.29742  | 1.99886  |

H5  
22

|   |          |          |          |
|---|----------|----------|----------|
| C | -2.63426 | 1.65613  | 0.34756  |
| C | -2.49653 | 0.27245  | 0.83571  |
| N | -2.41484 | 2.00514  | -0.86898 |
| H | -2.93020 | 2.43693  | 1.04618  |
| H | -2.13035 | 1.28620  | -1.54136 |
| H | -2.49430 | 2.96785  | -1.18169 |
| H | -3.38115 | 0.01682  | 1.42969  |
| H | -1.62823 | 0.28806  | 1.51079  |
| S | -2.18637 | -0.97497 | -0.48232 |
| N | 0.67615  | 1.04529  | 0.93666  |
| C | 1.58594  | -0.03953 | 0.54897  |
| H | 0.92535  | 1.36273  | 1.86996  |
| C | 2.88039  | 0.52074  | -0.06187 |
| C | 0.95919  | -0.99578 | -0.48401 |
| H | 1.85434  | -0.62276 | 1.43239  |
| O | 3.86454  | -0.38895 | -0.07075 |
| O | 2.97552  | 1.63646  | -0.50703 |
| H | 1.68931  | -1.75281 | -0.77975 |
| H | 0.64406  | -0.46663 | -1.38502 |
| S | -0.46332 | -1.97335 | 0.15662  |
| H | 4.65066  | -0.00059 | -0.48863 |
| H | 0.87747  | 1.84014  | 0.32904  |

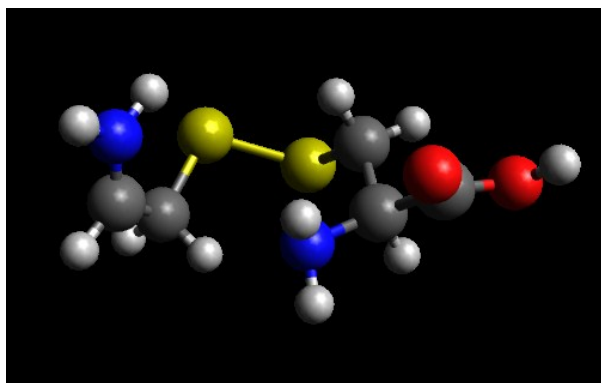

D1  
22

|   |          |          |          |
|---|----------|----------|----------|
| C | -0.27624 | 1.67738  | 0.22140  |
| C | -1.78990 | 1.46434  | 0.33915  |
| N | 0.25790  | 1.58688  | -1.07088 |
| H | -0.01274 | 2.61721  | 0.71044  |
| H | -0.38877 | 1.28617  | -1.78885 |
| H | 0.86720  | 2.33777  | -1.36067 |
| H | -2.27960 | 2.34054  | -0.09554 |
| H | -2.10105 | 1.40136  | 1.38439  |
| S | -2.45818 | 0.04214  | -0.60079 |
| N | 0.45284  | 0.61500  | 1.20240  |
| C | 1.08439  | -0.62441 | 0.61811  |
| H | -0.21446 | 0.32770  | 1.92201  |
| C | 2.41352  | -0.17318 | 0.00318  |
| C | 0.16301  | -1.47641 | -0.26514 |
| H | 1.36265  | -1.21928 | 1.49596  |
| O | 2.88166  | -1.05709 | -0.86959 |
| O | 2.96694  | 0.83666  | 0.35944  |
| H | 0.54987  | -2.49669 | -0.27490 |
| H | 0.13112  | -1.12175 | -1.29166 |
| S | -1.55641 | -1.58429 | 0.38150  |
| H | 3.75921  | -0.77582 | -1.17965 |
| H | 1.22725  | 1.12119  | 1.64739  |

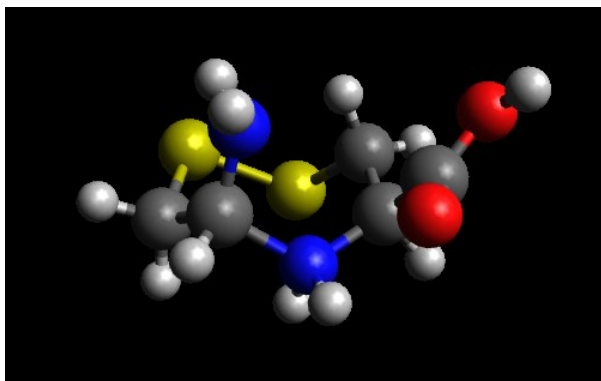

|    |          |          |          |
|----|----------|----------|----------|
| D2 |          |          |          |
| 22 |          |          |          |
| C  | -0.47084 | 1.56648  | 0.67676  |
| C  | -1.95349 | 1.16027  | 0.61751  |
| N  | -0.03066 | 2.02901  | -0.74441 |
| H  | -0.40697 | 2.46262  | 1.29626  |
| H  | -0.53962 | 1.46233  | -1.43925 |
| H  | -0.23849 | 3.01433  | -0.91677 |
| H  | -2.57030 | 2.03011  | 0.36662  |
| H  | -2.24305 | 0.80836  | 1.60695  |
| S  | -2.37693 | -0.10234 | -0.63438 |
| N  | 0.42808  | 0.61974  | 1.25337  |
| C  | 1.11206  | -0.52107 | 0.64680  |
| H  | 0.99819  | 1.03387  | 1.97633  |
| C  | 2.38536  | -0.07982 | -0.09313 |
| C  | 0.31598  | -1.40487 | -0.34668 |
| H  | 1.41924  | -1.15774 | 1.47904  |
| O  | 3.36088  | -0.97075 | -0.00961 |
| O  | 2.47888  | 0.96538  | -0.71488 |
| H  | 0.83347  | -2.36331 | -0.42747 |
| H  | 0.28756  | -0.97369 | -1.34942 |
| S  | -1.40456 | -1.79239 | 0.13473  |
| H  | 4.13168  | -0.67020 | -0.52146 |
| H  | 0.99776  | 1.84479  | -0.85061 |

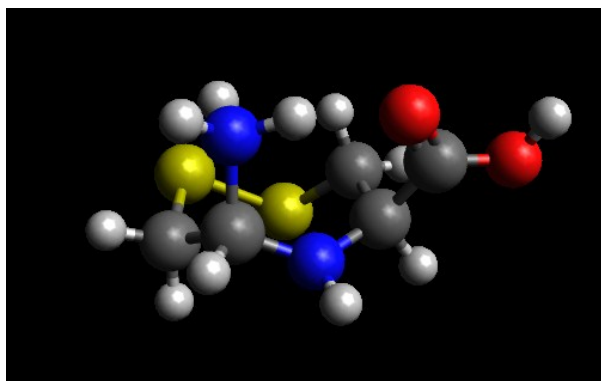

|    |          |          |          |
|----|----------|----------|----------|
| D3 |          |          |          |
| 22 |          |          |          |
| C  | -1.73754 | 0.65307  | 1.09121  |
| S  | -2.37519 | -0.61011 | -0.08724 |
| S  | -0.87943 | -2.08087 | -0.02870 |
| C  | 0.58791  | -1.20542 | -0.68064 |
| C  | 1.08583  | -0.06451 | 0.23062  |
| C  | 2.59916  | 0.17762  | 0.07266  |
| O  | 3.08467  | 1.26934  | -0.07889 |
| C  | -0.79697 | 1.67580  | 0.44761  |
| N  | -1.56545 | 2.23490  | -0.82414 |
| N  | 0.46074  | 1.23732  | -0.02219 |
| O  | 3.29091  | -0.95964 | 0.16619  |
| H  | -0.71821 | 2.55777  | 1.09159  |
| H  | -1.88593 | 1.40592  | -1.35250 |
| H  | -2.37563 | 2.81761  | -0.59305 |
| H  | -2.61634 | 1.17053  | 1.48619  |
| H  | -1.24504 | 0.16226  | 1.93094  |
| H  | 1.18033  | 1.95637  | -0.00547 |
| H  | 0.96462  | -0.38565 | 1.27371  |
| H  | 1.33975  | -1.99665 | -0.72127 |
| H  | 0.40766  | -0.84457 | -1.69428 |
| H  | 4.23968  | -0.76104 | 0.10244  |
| H  | -0.91893 | 2.77059  | -1.40623 |

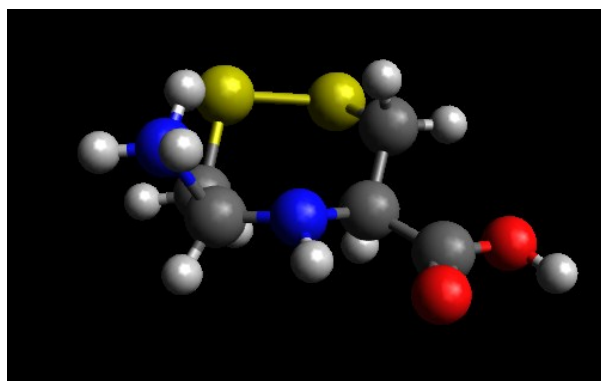

|    |          |          |          |
|----|----------|----------|----------|
| P1 |          |          |          |
| 22 |          |          |          |
| C  | -0.44166 | 1.67672  | 0.39873  |
| C  | -1.92404 | 1.25974  | 0.51188  |
| N  | 0.05142  | 1.90680  | -0.95125 |
| H  | -0.36447 | 2.61931  | 0.94979  |
| H  | -0.47442 | 1.37099  | -1.63795 |
| H  | -0.01332 | 2.88368  | -1.21474 |
| H  | -2.54497 | 2.11102  | 0.21452  |
| H  | -2.17408 | 1.00852  | 1.54439  |
| S  | -2.46757 | -0.09973 | -0.58166 |
| N  | 0.53216  | 0.79861  | 1.10756  |
| C  | 1.05077  | -0.47501 | 0.62294  |

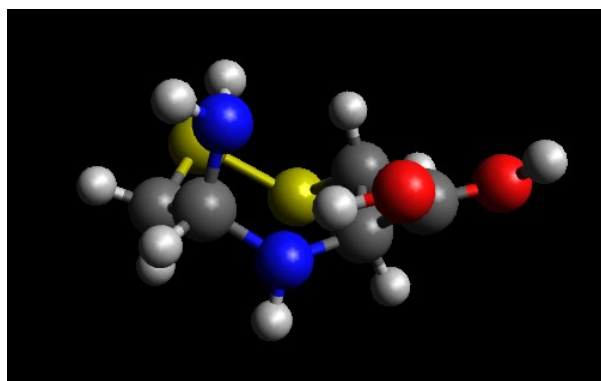

|   |          |          |          |
|---|----------|----------|----------|
| H | 0.32370  | 0.74731  | 2.09664  |
| C | 2.40561  | -0.20766 | -0.00253 |
| C | 0.23469  | -1.39749 | -0.33845 |
| H | 1.27301  | -1.08370 | 1.50676  |
| O | 3.13893  | -1.20253 | -0.35716 |
| O | 2.82668  | 0.97418  | -0.17593 |
| H | 0.74231  | -2.36273 | -0.40072 |
| H | 0.17334  | -0.98287 | -1.34418 |
| S | -1.45619 | -1.72567 | 0.26395  |
| H | 3.99041  | -0.92900 | -0.74795 |
| H | 2.08662  | 1.57481  | 0.13192  |

P2  
22

|   |          |          |          |
|---|----------|----------|----------|
| C | -1.97716 | 0.88143  | 0.86412  |
| S | -2.47761 | -0.39116 | -0.35312 |
| S | -1.12815 | -1.92720 | 0.08355  |
| C | 0.44533  | -1.18974 | -0.49194 |
| C | 1.14462  | -0.26471 | 0.51976  |
| C | 2.57185  | 0.01393  | 0.00540  |
| O | 2.96329  | 1.10306  | -0.33166 |
| C | -0.67420 | 1.63099  | 0.56190  |
| N | -0.80205 | 2.12221  | -1.02165 |
| N | 0.55288  | 1.04649  | 0.82215  |
| O | 3.30259  | -1.10267 | -0.01667 |
| H | -0.69416 | 2.59354  | 1.07424  |
| H | 0.12747  | 2.36247  | -1.37191 |
| H | -1.19056 | 1.33538  | -1.56137 |
| H | -2.80430 | 1.59716  | 0.88606  |
| H | -1.89401 | 0.43295  | 1.85450  |
| H | 1.28164  | 1.72558  | 1.00008  |
| H | 1.24879  | -0.83025 | 1.45218  |
| H | 1.10226  | -2.04859 | -0.64477 |
| H | 0.29517  | -0.72077 | -1.46753 |
| H | 4.19497  | -0.89747 | -0.34102 |
| H | -1.42048 | 2.92835  | -1.13967 |

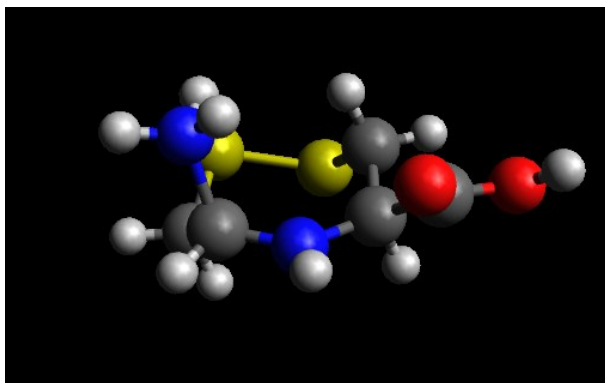

I  
18

|   |          |          |          |
|---|----------|----------|----------|
| C | -1.82563 | 1.30649  | 0.76378  |
| S | -2.52973 | 0.04384  | -0.40425 |
| S | -1.36349 | -1.61257 | 0.14288  |
| C | 0.29539  | -1.14188 | -0.48125 |
| C | 0.97606  | 0.00300  | 0.29513  |
| C | 2.49111  | 0.04938  | 0.02211  |
| O | 3.01803  | 0.98435  | -0.52446 |
| C | -0.65695 | 1.89978  | 0.07598  |
| N | 0.49223  | 1.34401  | -0.10581 |
| O | 3.08900  | -1.05060 | 0.45645  |
| H | -0.76027 | 2.88681  | -0.37034 |
| H | -2.58884 | 2.06404  | 0.93782  |
| H | -1.57177 | 0.81130  | 1.70231  |
| H | 1.22019  | 1.86173  | -0.61459 |
| H | 0.82184  | -0.12870 | 1.36975  |
| H | 0.89115  | -2.04542 | -0.33540 |
| H | 0.25437  | -0.92292 | -1.54965 |
| H | 4.04315  | -1.00600 | 0.27232  |

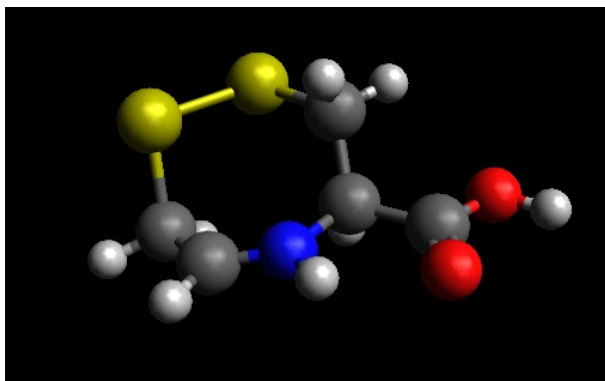

J1  
22

|   |          |         |          |
|---|----------|---------|----------|
| C | -2.80037 | 1.37592 | 0.08133  |
| C | -2.20612 | 0.40453 | 0.84718  |
| N | -3.06172 | 1.31791 | -1.22976 |

|   |          |          |          |
|---|----------|----------|----------|
| H | -3.07682 | 2.31175  | 0.55995  |
| H | -2.93578 | 0.45455  | -1.73974 |
| H | -2.20450 | 0.53722  | 1.92358  |
| H | -0.15653 | 0.80611  | 1.00064  |
| S | -1.95894 | -1.24451 | 0.25858  |
| H | -3.55609 | 2.06422  | -1.69071 |
| N | 0.80693  | 0.96074  | 1.39045  |
| C | 1.81007  | -0.06222 | 0.90830  |
| H | 0.72991  | 0.97812  | 2.40829  |
| C | 2.56597  | 0.63606  | -0.23279 |
| C | 1.16112  | -1.39772 | 0.53840  |
| H | 2.53030  | -0.21585 | 1.71860  |
| O | 3.36753  | -0.19881 | -0.87551 |
| O | 2.44062  | 1.81611  | -0.44750 |
| H | 0.69994  | -1.86306 | 1.41105  |
| H | 1.94504  | -2.06435 | 0.17641  |
| S | -0.09291 | -1.24287 | -0.79889 |
| H | 3.85780  | 0.27898  | -1.56615 |
| H | 1.13071  | 1.88198  | 1.04787  |

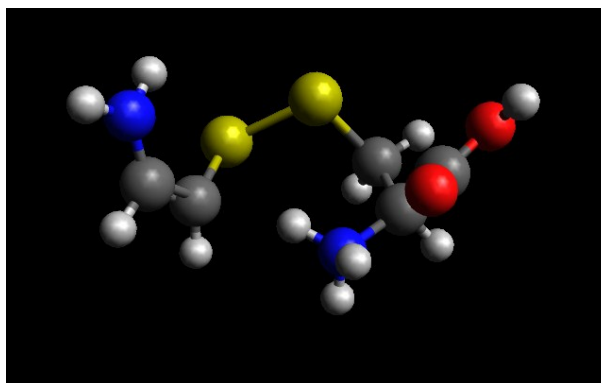

|    |          |          |          |
|----|----------|----------|----------|
| J2 |          |          |          |
| 22 |          |          |          |
| C  | -2.20236 | 1.76084  | -0.16166 |
| C  | -2.78277 | 0.58797  | 0.08625  |
| N  | -0.77051 | 1.92349  | -0.42676 |
| H  | -2.77035 | 2.67997  | -0.15437 |
| H  | -0.45459 | 1.41942  | -1.26162 |
| H  | -3.84926 | 0.61448  | 0.29817  |
| H  | -0.17656 | 1.51367  | 0.38561  |
| S  | -2.26466 | -1.09652 | 0.12422  |
| H  | -0.51928 | 2.90470  | -0.54890 |
| N  | 0.65918  | 0.69432  | 1.60098  |
| C  | 1.57287  | -0.29657 | 1.00387  |
| H  | 0.04718  | 0.24012  | 2.27574  |
| C  | 2.35076  | 0.37138  | -0.13200 |
| C  | 0.81453  | -1.53619 | 0.49847  |
| H  | 2.31180  | -0.66316 | 1.72717  |
| O  | 3.39748  | -0.36998 | -0.49785 |
| O  | 2.04206  | 1.42227  | -0.64219 |
| H  | 0.29745  | -2.02873 | 1.32365  |
| H  | 1.52999  | -2.25000 | 0.08644  |
| S  | -0.40570 | -1.27572 | -0.86712 |
| H  | 3.86297  | 0.06517  | -1.23122 |
| H  | 1.19117  | 1.39269  | 2.11680  |

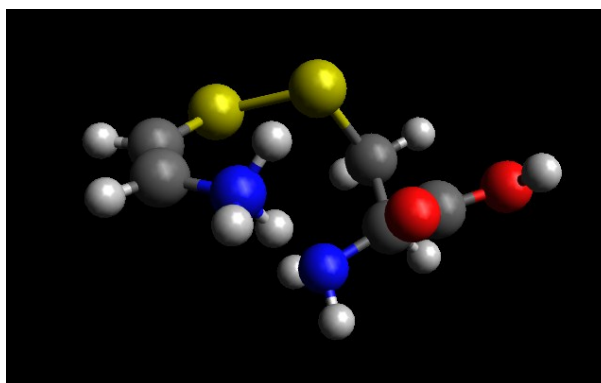

|    |          |          |          |
|----|----------|----------|----------|
| J3 |          |          |          |
| 22 |          |          |          |
| C  | -2.44895 | 1.61485  | -0.44053 |
| C  | -2.86207 | 0.25090  | -0.62346 |
| N  | -1.41850 | 1.98366  | 0.25294  |
| H  | -3.01425 | 2.39699  | -0.94284 |
| H  | 0.43274  | -1.10087 | -1.62540 |
| H  | -3.55445 | 0.07709  | -1.44300 |
| H  | -0.75835 | 1.31700  | 0.72353  |
| S  | -2.33114 | -0.99691 | 0.30145  |
| H  | -1.16382 | 2.96349  | 0.29363  |
| N  | 0.62086  | 0.46666  | 1.68492  |
| C  | 1.76570  | -0.04149 | 0.91774  |
| H  | 0.25289  | -0.25691 | 2.29629  |
| C  | 2.04601  | 0.90632  | -0.25219 |
| C  | 1.60480  | -1.50335 | 0.47052  |
| H  | 2.68958  | -0.04353 | 1.51462  |
| O  | 3.09974  | 0.48885  | -0.96875 |

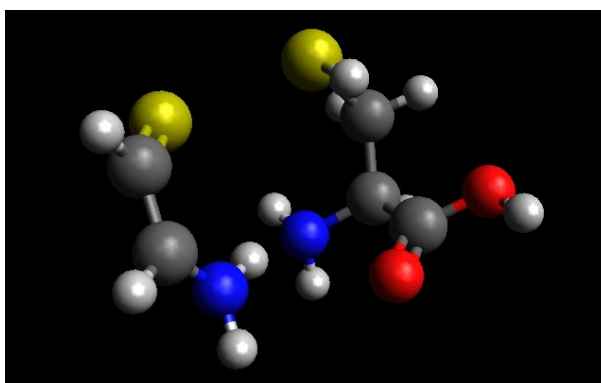

|   |         |          |          |
|---|---------|----------|----------|
| O | 1.41736 | 1.90651  | -0.49139 |
| H | 1.48561 | -2.14457 | 1.34602  |
| H | 2.50990 | -1.82046 | -0.04706 |
| S | 0.18861 | -1.96728 | -0.61733 |
| H | 3.28677 | 1.13554  | -1.66848 |
| H | 0.92752 | 1.22480  | 2.29024  |

J4  
22

|   |          |          |          |
|---|----------|----------|----------|
| C | 2.89646  | -1.12875 | -0.56402 |
| C | 2.99139  | 0.04072  | 0.31686  |
| N | 1.76805  | -1.66740 | -0.85591 |
| H | 3.84132  | -1.51462 | -0.95208 |
| H | -3.26525 | 1.10808  | 1.43690  |
| H | 2.04832  | 0.45724  | 0.66892  |
| H | 0.20375  | -1.36699 | -0.32398 |
| S | 4.41969  | 0.68614  | 0.73690  |
| H | 1.88943  | -2.47066 | -1.47476 |
| N | -0.83749 | -1.32197 | -0.00551 |
| C | -1.66852 | -0.38178 | -0.82334 |
| H | -0.87857 | -1.02565 | 0.97759  |
| C | -1.05956 | 1.00940  | -0.65291 |
| C | -3.15224 | -0.43921 | -0.41004 |
| H | -1.57416 | -0.67857 | -1.87145 |
| O | -1.66259 | 1.89023  | -1.44871 |
| O | -0.16582 | 1.24874  | 0.11712  |
| H | -3.56326 | -1.42011 | -0.65839 |
| H | -3.71063 | 0.30066  | -0.98121 |
| S | -3.44677 | -0.22859 | 1.39042  |
| H | -1.26706 | 2.76939  | -1.32420 |
| H | -1.22239 | -2.26780 | -0.05102 |

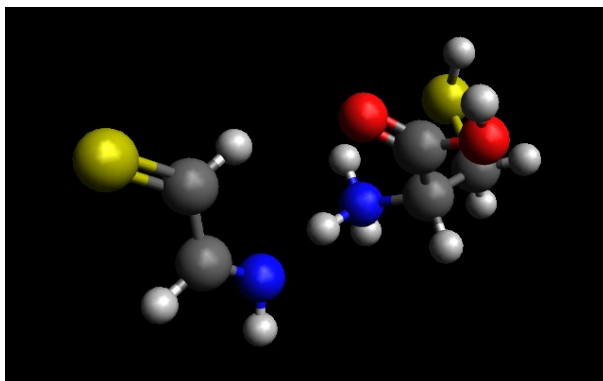

K2  
22

|   |          |          |          |
|---|----------|----------|----------|
| C | -2.53540 | 1.48049  | 0.22441  |
| C | -2.62881 | 0.24696  | 0.76120  |
| N | -1.95023 | 1.79552  | -0.98946 |
| H | -2.85389 | 2.33414  | 0.81591  |
| H | -1.96950 | 1.06464  | -1.69324 |
| H | -3.04731 | 0.12677  | 1.75266  |
| H | 0.15602  | 1.57016  | 1.57841  |
| S | -2.27795 | -1.28739 | -0.05909 |
| H | -2.20226 | 2.69742  | -1.37248 |
| N | 0.71285  | 1.35409  | 0.74987  |
| C | 1.56607  | 0.12488  | 0.93200  |
| H | 1.32287  | 2.14446  | 0.49938  |
| C | 2.72046  | 0.29147  | -0.06846 |
| C | 0.74487  | -1.16461 | 0.80100  |
| H | 2.00622  | 0.17705  | 1.93312  |
| O | 3.42803  | -0.82222 | -0.19115 |
| O | 2.93680  | 1.34271  | -0.61566 |
| H | 0.07303  | -1.28223 | 1.65192  |
| H | 1.43218  | -2.00998 | 0.78672  |
| S | -0.25989 | -1.17842 | -0.74614 |
| H | 4.17655  | -0.67420 | -0.79421 |
| H | 0.05144  | 1.21835  | -0.04375 |

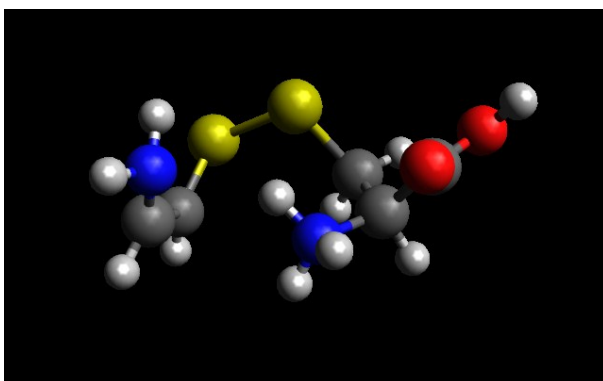

K3  
22

|   |          |         |          |
|---|----------|---------|----------|
| C | -2.29025 | 1.66655 | -0.37092 |
| C | -2.97259 | 0.51170 | -0.19397 |
| N | -0.93586 | 1.78533 | -0.10364 |
| H | -2.76666 | 2.50289 | -0.87085 |

|   |          |          |          |
|---|----------|----------|----------|
| H | -0.34901 | 0.40744  | -0.81295 |
| H | -3.99773 | 0.41564  | -0.52534 |
| H | -0.56299 | 1.37961  | 0.77060  |
| S | -2.22530 | -0.94106 | 0.42859  |
| H | -0.51649 | 2.68492  | -0.30912 |
| N | 0.85196  | 0.31692  | 1.76166  |
| C | 1.68645  | -0.49417 | 0.87750  |
| H | 0.50082  | -0.23875 | 2.53654  |
| C | 2.40902  | 0.42735  | -0.11221 |
| C | 0.88594  | -1.59445 | 0.16660  |
| H | 2.48332  | -1.03714 | 1.40977  |
| O | 3.18839  | -0.27805 | -0.94463 |
| O | 2.29301  | 1.62431  | -0.12739 |
| H | 0.41695  | -2.26470 | 0.88919  |
| H | 1.53630  | -2.18476 | -0.47912 |
| S | -0.48678 | -1.03766 | -0.95790 |
| H | 3.66927  | 0.33212  | -1.52774 |
| H | 1.40411  | 1.07462  | 2.15596  |

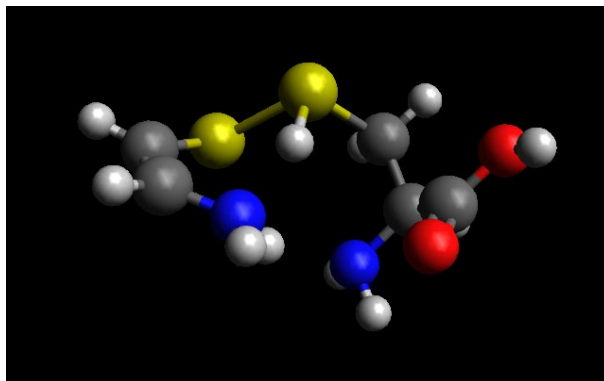

K4  
22

|   |          |          |          |
|---|----------|----------|----------|
| C | 2.91138  | -0.97747 | 0.31568  |
| C | 2.67096  | 0.04099  | -0.72874 |
| N | 2.06480  | -1.28372 | 1.22491  |
| H | 3.88823  | -1.46317 | 0.32829  |
| H | -2.43971 | 1.46576  | -1.36104 |
| H | 2.32465  | -0.31101 | -1.70008 |
| H | 1.06240  | -0.86540 | 1.27761  |
| S | 3.03472  | 1.57627  | -0.38163 |
| H | 2.34089  | -1.94579 | 1.94544  |
| N | -0.46288 | -0.16513 | 1.49062  |
| C | -1.59942 | -0.73913 | 0.74623  |
| H | -0.34465 | 0.80230  | 1.17749  |
| C | -1.11161 | -1.20011 | -0.62633 |
| C | -2.82140 | 0.20104  | 0.65308  |
| H | -1.92296 | -1.64882 | 1.26614  |
| O | -2.11885 | -1.65961 | -1.37486 |
| O | 0.04100  | -1.17800 | -0.99160 |
| H | -3.18601 | 0.40809  | 1.66074  |
| H | -3.62993 | -0.27060 | 0.09800  |
| S | -2.44137 | 1.84890  | -0.06727 |
| H | -1.76919 | -1.97345 | -2.22442 |
| H | -0.70735 | -0.10979 | 2.47766  |

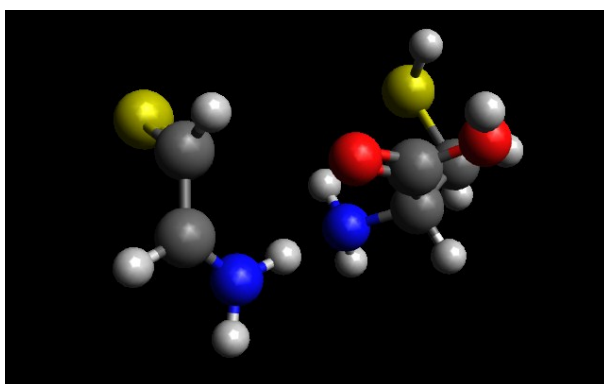

L  
15

|   |          |          |          |
|---|----------|----------|----------|
| H | -1.29976 | -1.20662 | -1.28108 |
| H | -0.78158 | 1.62822  | -0.51709 |
| N | 0.03254  | 1.77837  | 0.11467  |
| C | 0.31667  | 0.45752  | 0.78597  |
| H | -0.17619 | 2.53331  | 0.77068  |
| C | 1.40244  | -0.20064 | -0.08013 |
| C | -0.97678 | -0.36126 | 0.95834  |
| H | 0.75896  | 0.66184  | 1.76501  |
| O | 1.62974  | -1.45107 | 0.28975  |
| O | 1.96383  | 0.40471  | -0.95760 |
| H | -1.58933 | 0.07456  | 1.74945  |
| H | -0.71941 | -1.37437 | 1.26100  |
| S | -2.05169 | -0.37257 | -0.53031 |
| H | 2.35587  | -1.82961 | -0.23584 |
| H | 0.84818  | 2.02235  | -0.47209 |

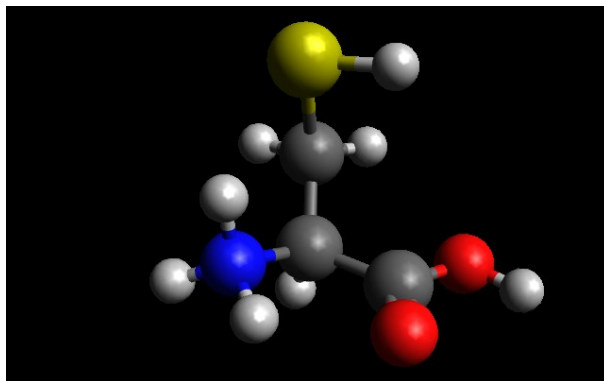

Supplement: c5cp08014b1.pdf [file c5cp08014b1.pdf]
